# Supplementary material for: Bioinformatics and Next-Generation Data Analysis for Identification of Genes and Molecular Pathways Involved in Subjects with Diabetes and Obesity
Source: MDPI journal article supplement (doi:10.3390/medicina59020309), 2023-02-07
Supplement: s1 [file s1]

**Table S1.** The statistical metrics for key differentially expressed genes (DEGs).

| Gene Symbol   | logFC    | pValue   | adj.P.Val | tvalue   | Regulation | Gene Name                                                              |
|---------------|----------|----------|-----------|----------|------------|------------------------------------------------------------------------|
| KDM5D         | 5.006563 | 8.7E-23  | 3.29E-22  | 10.97252 | Up         | lysine demethylase 5D                                                  |
| DDX3Y         | 4.136584 | 2.21E-23 | 9.1E-23   | 11.16119 | Up         | DEAD-box helicase 3 Y-linked                                           |
| UTY           | 4.070223 | 2.16E-23 | 8.91E-23  | 11.16417 | Up         | ubiquitously transcribed tetratricopeptide repeat containing, Y-linked |
| RPS4Y1        | 3.719159 | 1.61E-22 | 5.97E-22  | 10.88712 | Up         | ribosomal protein S4 Y-linked 1                                        |
| EIF1AY        | 3.710641 | 3.69E-21 | 1.24E-20  | 10.45171 | Up         | eukaryotic translation initiation factor 1A Y-linked                   |
| TXLNGY        | 3.657216 | 1.09E-24 | 5E-23     | 11.57187 | Up         | taxilin gamma pseudogene, Y-linked                                     |
| ZFY           | 3.196376 | 3.56E-25 | 3.97E-23  | 11.72394 | Up         | zinc finger protein Y-linked                                           |
| USP9Y         | 3.054299 | 1.7E-27  | 2.74E-25  | 12.44369 | Up         | ubiquitin specific peptidase 9 Y-linked                                |
| PRKY          | 2.646358 | 2.69E-25 | 3.1E-23   | 11.76204 | Up         | protein kinase Y-linked (pseudogene)                                   |
| TTY14         | 2.513856 | 2.38E-22 | 8.66E-22  | 10.83353 | Up         | testis-specific transcript, Y-linked 14                                |
| JMJD7-PLA2G4B | 2.341619 | 7.14E-37 | 4.24E-34  | 15.29814 | Up         | JMJD7-PLA2G4B readthrough                                              |
| GYG2P1        | 2.233505 | 2.84E-21 | 9.57E-21  | 10.48845 | Up         | glycogenin 2 pseudogene 1                                              |
| PPP1R16B      | 2.224558 | 2.69E-29 | 5.59E-27  | 12.99622 | Up         | protein phosphatase 1 regulatory subunit 16B                           |
| NPIP15        | 1.987655 | 3.06E-10 | 5.77E-10  | 6.585861 | Up         | nuclear pore complex interacting protein family member B15             |
| ZNF646        | 1.979401 | 1.2E-47  | 8.69E-44  | 18.59107 | Up         | zinc finger protein 646                                                |
| ZNF319        | 1.951946 | 6.77E-37 | 4.11E-34  | 15.30502 | Up         | zinc finger protein 319                                                |
| LINC00278     | 1.936282 | 2.21E-24 | 5E-23     | 11.47602 | Up         | long intergenic non-protein coding RNA 278                             |
| NSMF          | 1.918356 | 7.56E-48 | 7.33E-44  | 18.65279 | Up         | NMDA receptor synaptonuclearsignaling and neuronal migration factor    |
| SBF1          | 1.903964 | 8.22E-49 | 9.56E-45  | 18.9521  | Up         | SET binding factor 1                                                   |
| NOTCH2NLA     | 1.889919 | 1.37E-27 | 2.27E-25  | 12.47183 | Up         | notch 2 N-terminal like A                                              |
| PLCG1         | 1.859398 | 1.47E-46 | 8.01E-43  | 18.25362 | Up         | phospholipase C gamma 1                                                |
| EDC4          | 1.850651 | 9.13E-51 | 1.77E-46  | 19.56249 | Up         | enhancer of mRNA decapping 4                                           |
| EVPL          | 1.838017 | 3.97E-42 | 6.42E-39  | 16.89446 | Up         | envoplakin                                                             |
| SLC17A9       | 1.828051 | 5.2E-19  | 1.53E-18  | 9.750293 | Up         | solute carrier family 17 member 9                                      |
| ZDHHC11B      | 1.827313 | 1.75E-22 | 6.43E-22  | 10.87596 | Up         | zinc finger DHHC-type containing 11B                                   |
| HPCAL4        | 1.817644 | 5.65E-19 | 1.66E-18  | 9.738261 | Up         | hippocalcin like 4                                                     |
| AATK          | 1.811724 | 3.21E-44 | 9.33E-41  | 17.53451 | Up         | apoptosis associated tyrosine kinase                                   |
| COL1A1        | 1.803059 | 6.32E-13 | 1.35E-12  | 7.628451 | Up         | collagen type I alpha 1 chain                                          |
| NOTCH3        | 1.774964 | 1.94E-26 | 2.71E-24  | 12.11706 | Up         | notch receptor 3                                                       |
| GPRIN1        | 1.745359 | 3.1E-32  | 9.21E-30  | 13.89188 | Up         | G protein regulated inducer of neurite outgrowth 1                     |
| SIK1          | 1.739946 | 8.18E-17 | 2.08E-16  | 9.011793 | Up         | salt inducible kinase 1                                                |

|          |          |          |          |          |    |                                                                        |
|----------|----------|----------|----------|----------|----|------------------------------------------------------------------------|
| CRYBG2   | 1.726069 | 3.85E-30 | 8.88E-28 | 13.2545  | Up | crystallin beta-gamma domain containing 2                              |
| POLE     | 1.718958 | 1E-47    | 8.34E-44 | 18.61453 | Up | DNA polymerase epsilon, catalytic subunit                              |
| WDR81    | 1.703126 | 9.68E-44 | 2.56E-40 | 17.38756 | Up | WD repeat domain 81                                                    |
| MYH9     | 1.676655 | 1.57E-49 | 2.29E-45 | 19.17585 | Up | myosin heavy chain 9                                                   |
| DAW1     | 1.668583 | 4.26E-10 | 7.99E-10 | 6.527126 | Up | dynein assembly factor with WD repeats 1                               |
| SLC9A3   | 1.661086 | 3.3E-25  | 3.73E-23 | 11.73409 | Up | solute carrier family 9 member A3                                      |
| PITPNM1  | 1.655779 | 2.31E-44 | 7.47E-41 | 17.57815 | Up | phosphatidylinositol transfer protein membrane associated 1            |
| ROBO1    | 1.655184 | 2.55E-13 | 5.51E-13 | 7.774736 | Up | roundabout guidance receptor 1                                         |
| INTS1    | 1.647598 | 1.5E-43  | 3.8E-40  | 17.32893 | Up | integrator complex subunit 1                                           |
| NYNRIN   | 1.639731 | 1.76E-25 | 2.15E-23 | 11.81962 | Up | NYN domain and retroviral integrase containing                         |
| SLC12A7  | 1.635974 | 6.25E-52 | 1.82E-47 | 19.92856 | Up | solute carrier family 12 member 7                                      |
| ZNF598   | 1.632571 | 2.29E-33 | 8.02E-31 | 14.23559 | Up | zinc finger protein 598                                                |
| PPP6R1   | 1.629126 | 5.04E-45 | 1.83E-41 | 17.78112 | Up | protein phosphatase 6 regulatory subunit 1                             |
| COL18A1  | 1.621947 | 7.18E-16 | 1.75E-15 | 8.686496 | Up | collagen type XVIII alpha 1 chain                                      |
| GRAMD4   | 1.62178  | 5.99E-42 | 9.41E-39 | 16.84019 | Up | GRAM domain containing 4                                               |
| MAPK8IP1 | 1.610516 | 1.34E-20 | 4.38E-20 | 10.27046 | Up | mitogen-activated protein kinase 8 interacting protein 1               |
| MAN2A2   | 1.609577 | 1.68E-38 | 1.24E-35 | 15.79199 | Up | mannosidase alpha class 2A member 2                                    |
| CNOT1    | 1.607611 | 1.51E-46 | 8.01E-43 | 18.25007 | Up | CCR4-NOT transcription complex subunit 1                               |
| CACNA1H  | 1.606751 | 6.35E-21 | 2.11E-20 | 10.37568 | Up | calcium voltage-gated channel subunit alpha1 H                         |
| TAF1C    | 1.603583 | 1.21E-36 | 6.68E-34 | 15.22922 | Up | TATA-box binding protein associated factor, RNA polymerase I subunit C |
| DMBT1    | 1.60288  | 3.46E-15 | 8.17E-15 | 8.447147 | Up | deleted in malignant brain tumors 1                                    |
| SEZ6     | 1.598893 | 7.45E-19 | 2.17E-18 | 9.698622 | Up | seizure related 6 homolog                                              |
| DGKQ     | 1.593962 | 4.49E-52 | 1.82E-47 | 19.97375 | Up | diacylglycerol kinase theta                                            |
| ARVCF    | 1.592098 | 9.55E-18 | 2.54E-17 | 9.328467 | Up | ARVCF delta catenin family member                                      |
| MST1R    | 1.591148 | 6.15E-43 | 1.19E-39 | 17.1419  | Up | macrophage stimulating 1 receptor                                      |
| OPLAH    | 1.590504 | 2.18E-43 | 5.08E-40 | 17.27938 | Up | 5-oxoprolinase, ATP-hydrolysing                                        |
| ZNF316   | 1.5893   | 6.1E-38  | 4.08E-35 | 15.62201 | Up | zinc finger protein 316                                                |
| HSPG2    | 1.58419  | 9.22E-35 | 3.94E-32 | 14.65846 | Up | heparansulfate proteoglycan 2                                          |
| ZDHHC8   | 1.572303 | 1.83E-28 | 3.46E-26 | 12.74083 | Up | zinc finger DHHC-type containing 8                                     |
| PPP1R26  | 1.572208 | 3.07E-36 | 1.58E-33 | 15.10616 | Up | protein phosphatase 1 regulatory subunit 26                            |
| ITPR3    | 1.567244 | 4.26E-39 | 3.59E-36 | 15.97248 | Up | inositol 1,4,5-trisphosphate receptor type 3                           |
| DCHS1    | 1.558789 | 2.54E-20 | 8.22E-20 | 10.1802  | Up | dachsous cadherin-related 1                                            |
| MYO18A   | 1.558693 | 6.7E-43  | 1.26E-39 | 17.1305  | Up | myosin XVIIIa                                                          |
| PHRF1    | 1.557745 | 1.72E-45 | 7.68E-42 | 17.92503 | Up | PHD and ring finger domains 1                                          |

|           |          |          |          |          |    |                                                           |
|-----------|----------|----------|----------|----------|----|-----------------------------------------------------------|
| NTNG2     | 1.555737 | 3.21E-18 | 8.82E-18 | 9.487351 | Up | netrin G2                                                 |
| MYO7B     | 1.554441 | 2.13E-42 | 3.65E-39 | 16.97705 | Up | myosin VIIB                                               |
| OPRK1     | 1.552814 | 1.2E-12  | 2.51E-12 | 7.524967 | Up | opioid receptor kappa 1                                   |
| CHPF2     | 1.550982 | 1.03E-38 | 7.81E-36 | 15.85577 | Up | chondroitin polymerizing factor 2                         |
| FLNA      | 1.548865 | 4.51E-29 | 9.14E-27 | 12.92759 | Up | filamin A                                                 |
| SREBF2    | 1.54358  | 4.83E-39 | 3.9E-36  | 15.95617 | Up | sterol regulatory element binding transcription factor 2  |
| KIFC2     | 1.541309 | 1.4E-34  | 5.78E-32 | 14.60334 | Up | kinesin family member C2                                  |
| ZSWIM8    | 1.540738 | 4.22E-45 | 1.64E-41 | 17.80475 | Up | zinc finger SWIM-type containing 8                        |
| SGSM2     | 1.531883 | 3.14E-39 | 2.77E-36 | 16.01293 | Up | small G protein signaling modulator 2                     |
| AMIGO1    | 1.531298 | 1.92E-21 | 6.52E-21 | 10.54327 | Up | adhesion molecule with Ig like domain 1                   |
| NLRC3     | 1.531139 | 1.33E-21 | 4.57E-21 | 10.59421 | Up | NLR family CARD domain containing 3                       |
| TUBGCP6   | 1.528464 | 1.41E-42 | 2.57E-39 | 17.0314  | Up | tubulin gamma complex associated protein 6                |
| SP6       | 1.528296 | 1.6E-23  | 6.8E-23  | 11.2051  | Up | Sp6 transcription factor                                  |
| ZBTB7B    | 1.528224 | 9.08E-38 | 5.94E-35 | 15.56952 | Up | zinc finger and BTB domain containing 7B                  |
| CAPN15    | 1.524929 | 4.69E-41 | 5.57E-38 | 16.56774 | Up | calpain 15                                                |
| MED12L    | 1.523987 | 7.69E-15 | 1.78E-14 | 8.324426 | Up | mediator complex subunit 12L                              |
| INPPL1    | 1.523926 | 6.77E-40 | 6.91E-37 | 16.21522 | Up | inositol polyphosphate phosphatase like 1                 |
| NUMA1     | 1.523239 | 3.72E-41 | 4.51E-38 | 16.59843 | Up | nuclear mitotic apparatus protein 1                       |
| DAGLA     | 1.521846 | 3.22E-17 | 8.33E-17 | 9.15008  | Up | diacylglycerol lipase alpha                               |
| PLCH2     | 1.515783 | 6.41E-26 | 8.43E-24 | 11.95576 | Up | phospholipase C eta 2                                     |
| RAP1GAP   | 1.51542  | 1.51E-18 | 4.27E-18 | 9.596633 | Up | RAP1 GTPase activating protein                            |
| SCRIB     | 1.508891 | 1.57E-34 | 6.38E-32 | 14.5886  | Up | scribble planar cell polarity protein                     |
| HLF       | 1.508651 | 1.32E-15 | 3.19E-15 | 8.594222 | Up | HLF transcription factor, PAR bZIP family member          |
| DNAH1     | 1.507391 | 2.26E-39 | 2.12E-36 | 16.05604 | Up | dynein axonemal heavy chain 1                             |
| LINC02593 | 1.503404 | 4.78E-12 | 9.76E-12 | 7.297261 | Up | long intergenic non-protein coding RNA 2593               |
| GCN1      | 1.501349 | 1.12E-41 | 1.59E-38 | 16.75759 | Up | GCN1 activator of EIF2AK4                                 |
| LIME1     | 1.497861 | 8.22E-21 | 2.72E-20 | 10.33945 | Up | Lck interacting transmembrane adaptor 1                   |
| LIF       | 1.497851 | 2.41E-27 | 3.81E-25 | 12.39667 | Up | LIF interleukin 6 family cytokine                         |
| IL12RB2   | 1.492097 | 2.56E-15 | 6.1E-15  | 8.493085 | Up | interleukin 12 receptor subunit beta 2                    |
| ARAP1     | 1.491472 | 1.93E-41 | 2.49E-38 | 16.68557 | Up | ArfGAP with RhoGAP domain, ankyrin repeat and PH domain 1 |
| HR        | 1.491421 | 5.28E-29 | 1.07E-26 | 12.90664 | Up | HR lysine demethylase and nuclear receptor corepressor    |
| SSH3      | 1.490041 | 7.4E-41  | 8.61E-38 | 16.50759 | Up | slingshot protein phosphatase 3                           |
| MAN2C1    | 1.489744 | 2.99E-37 | 1.89E-34 | 15.41256 | Up | mannosidase alpha class 2C member 1                       |
| BAIAP3    | 1.48829  | 9.98E-18 | 2.65E-17 | 9.322013 | Up | BAI1 associated protein 3                                 |

|          |          |          |          |          |    |                                                               |
|----------|----------|----------|----------|----------|----|---------------------------------------------------------------|
| DLG5     | 1.486894 | 6.34E-42 | 9.71E-39 | 16.83256 | Up | discs large MAGUK scaffold protein 5                          |
| USP20    | 1.48295  | 1.38E-44 | 4.71E-41 | 17.64723 | Up | ubiquitin specific peptidase 20                               |
| GABRR2   | 1.478466 | 6.54E-19 | 1.92E-18 | 9.717314 | Up | gamma-aminobutyric acid type A receptor rho2 subunit          |
| ACHE     | 1.478366 | 4.44E-39 | 3.66E-36 | 15.96712 | Up | acetylcholinesterase (Cartwright blood group)                 |
| NCR3LG1  | 1.478315 | 2.93E-21 | 9.89E-21 | 10.48385 | Up | natural killer cell cytotoxicity receptor 3 ligand 1          |
| FAM83G   | 1.475383 | 1.52E-36 | 8.28E-34 | 15.19836 | Up | family with sequence similarity 83 member G                   |
| MAPK8IP3 | 1.466652 | 1.06E-34 | 4.47E-32 | 14.64015 | Up | mitogen-activated protein kinase 8 interacting protein 3      |
| AVPR1B   | 1.45665  | 8.12E-14 | 1.8E-13  | 7.956416 | Up | arginine vasopressin receptor 1B                              |
| SMCR8    | 1.454114 | 1.48E-30 | 3.64E-28 | 13.38103 | Up | SMCR8-C9orf72 complex subunit                                 |
| ELK1     | 1.451398 | 5.47E-23 | 2.13E-22 | 11.03648 | Up | ETS transcription factor ELK1                                 |
| RAI1     | 1.450765 | 7.47E-29 | 1.49E-26 | 12.86049 | Up | retinoic acid induced 1                                       |
| MIGA2    | 1.450256 | 9.85E-46 | 4.78E-42 | 17.99928 | Up | mitoguardin 2                                                 |
| SEC16A   | 1.449629 | 2.17E-45 | 9.04E-42 | 17.89343 | Up | SEC16 homolog A, endoplasmic reticulum export factor          |
| TMSB4Y   | 1.448197 | 3.63E-23 | 1.44E-22 | 11.09291 | Up | thymosin beta 4 Y-linked                                      |
| KCNG3    | 1.447929 | 1.22E-16 | 3.08E-16 | 8.952739 | Up | potassium voltage-gated channel modifier subfamily G member 3 |
| KLHL15   | 1.441575 | 1.69E-27 | 2.74E-25 | 12.44393 | Up | kelch like family member 15                                   |
| SLC37A2  | 1.439392 | 1.19E-24 | 5E-23    | 11.56003 | Up | solute carrier family 37 member 2                             |
| PDE4A    | 1.438872 | 3.84E-16 | 9.49E-16 | 8.780866 | Up | phosphodiesterase 4A                                          |
| CELA3B   | 1.437677 | 2.09E-13 | 4.55E-13 | 7.806062 | Up | chymotrypsin like elastase 3B                                 |
| TUBB3    | 1.437504 | 1.88E-11 | 3.74E-11 | 7.067846 | Up | tubulin beta 3 class III                                      |
| GVINP1   | 1.435197 | 6.52E-17 | 1.67E-16 | 9.045562 | Up | GTPase, very large interferon inducible pseudogene 1          |
| PI4KA    | 1.431833 | 1.83E-41 | 2.48E-38 | 16.69225 | Up | phosphatidylinositol 4-kinase alpha                           |
| RNF123   | 1.431003 | 1.58E-42 | 2.79E-39 | 17.01646 | Up | ring finger protein 123                                       |
| CMTR1    | 1.430304 | 4.68E-40 | 5.04E-37 | 16.26397 | Up | cap methyltransferase 1                                       |
| FGFR3    | 1.430102 | 4.96E-44 | 1.37E-40 | 17.4766  | Up | fibroblast growth factor receptor 3                           |
| SEMA6C   | 1.422171 | 1.25E-29 | 2.66E-27 | 13.09773 | Up | semaphorin 6C                                                 |
| NLGN4Y   | 1.419677 | 3.34E-21 | 1.12E-20 | 10.46588 | Up | neuroligin 4 Y-linked                                         |
| CUL7     | 1.414311 | 1.16E-28 | 2.24E-26 | 12.80171 | Up | cullin 7                                                      |
| ITGB4    | 1.414184 | 8.75E-42 | 1.27E-38 | 16.78991 | Up | integrin subunit beta 4                                       |
| SYT7     | 1.413869 | 2.42E-23 | 9.94E-23 | 11.1487  | Up | synaptotagmin 7                                               |
| OAS3     | 1.409483 | 4.93E-19 | 1.46E-18 | 9.75804  | Up | 2'-5'-oligoadenylate synthetase 3                             |
| CDON     | 1.408012 | 3.81E-15 | 8.98E-15 | 8.432346 | Up | cell adhesion associated, oncogene regulated                  |
| PTPRB    | 1.403807 | 2.37E-27 | 3.75E-25 | 12.39913 | Up | protein tyrosine phosphatase receptor type B                  |
| ATRNL1   | 1.398476 | 6.06E-12 | 1.23E-11 | 7.257681 | Up | attractin like 1                                              |

|                |          |          |          |          |    |                                                          |
|----------------|----------|----------|----------|----------|----|----------------------------------------------------------|
| CASKIN2        | 1.398006 | 1.02E-34 | 4.33E-32 | 14.64527 | Up | CASK interacting protein 2                               |
| BSN            | 1.395314 | 1.49E-11 | 2.97E-11 | 7.107318 | Up | bassoon presynaptic cytomatrix protein                   |
| KHNYN          | 1.391888 | 2.17E-41 | 2.68E-38 | 16.66992 | Up | KH and NYN domain containing                             |
| BRPF1          | 1.388276 | 2.87E-43 | 6.41E-40 | 17.24323 | Up | bromodomain and PHD finger containing 1                  |
| SLC26A1        | 1.38292  | 2.68E-25 | 3.09E-23 | 11.76257 | Up | solute carrier family 26 member 1                        |
| MAPKBP1        | 1.381821 | 2.32E-34 | 9.32E-32 | 14.53685 | Up | mitogen-activated protein kinase binding protein 1       |
| TRIM3          | 1.380962 | 3.23E-31 | 8.57E-29 | 13.58257 | Up | tripartite motif containing 3                            |
| ATXN2L         | 1.379909 | 1.94E-38 | 1.41E-35 | 15.77285 | Up | ataxin 2 like                                            |
| TOR4A          | 1.376873 | 1.85E-28 | 3.49E-26 | 12.73946 | Up | torsin family 4 member A                                 |
| TMEM201        | 1.376452 | 1.18E-12 | 2.48E-12 | 7.527023 | Up | transmembrane protein 201                                |
| AKR1B15        | 1.373679 | 1.46E-07 | 2.41E-07 | 5.427009 | Up | aldo-ketoreductase family 1 member B15                   |
| KLHL21         | 1.372247 | 1.16E-30 | 2.91E-28 | 13.41373 | Up | kelch like family member 21                              |
| POFUT2         | 1.37097  | 7.06E-34 | 2.63E-31 | 14.39044 | Up | protein O-fucosyltransferase 2                           |
| RPS6KA4        | 1.370687 | 2.61E-24 | 5E-23    | 11.45342 | Up | ribosomal protein S6 kinase A4                           |
| RTNL1-TNFRSF6B | 1.370426 | 1.42E-17 | 3.72E-17 | 9.27079  | Up | RTNL1-TNFRSF6B readthrough (NMD candidate)               |
| ADGRB2         | 1.368096 | 1.98E-41 | 2.5E-38  | 16.682   | Up | adhesion G protein-coupled receptor B2                   |
| MED12          | 1.366559 | 3.09E-40 | 3.46E-37 | 16.31865 | Up | mediator complex subunit 12                              |
| MAPK4          | 1.362743 | 6.23E-11 | 1.21E-10 | 6.863409 | Up | mitogen-activated protein kinase 4                       |
| EVI5L          | 1.362231 | 2.59E-27 | 4.07E-25 | 12.38697 | Up | ecotropic viral integration site 5 like                  |
| DOCK10         | 1.362067 | 6.57E-23 | 2.53E-22 | 11.01115 | Up | dedicator of cytokinesis 10                              |
| ACAP3          | 1.360748 | 5.31E-28 | 9.28E-26 | 12.59892 | Up | ArfGAP with coiled-coil, ankyrin repeat and PH domains 3 |
| CLUH           | 1.359859 | 2.39E-32 | 7.27E-30 | 13.92641 | Up | clustered mitochondria homolog                           |
| RAVER1         | 1.355045 | 1.24E-38 | 9.26E-36 | 15.83164 | Up | ribonucleoprotein, PTB binding 1                         |
| PLEC           | 1.353963 | 1.52E-33 | 5.42E-31 | 14.28969 | Up | plectin                                                  |
| NPC1           | 1.350595 | 3.21E-43 | 6.91E-40 | 17.22841 | Up | NPC intracellular cholesterol transporter 1              |
| TNS2           | 1.346251 | 1.36E-19 | 4.26E-19 | 9.941869 | Up | tensin 2                                                 |
| B4GALNT3       | 1.343671 | 5.57E-11 | 1.08E-10 | 6.88282  | Up | beta-1,4-N-acetyl-galactosaminyltransferase 3            |
| ARHGAP27       | 1.340067 | 6.96E-40 | 6.98E-37 | 16.2115  | Up | Rho GTPase activating protein 27                         |
| SEMA3D         | 1.338877 | 1.76E-09 | 3.2E-09  | 6.272075 | Up | semaphorin 3D                                            |
| MYO15B         | 1.33787  | 1.55E-35 | 7.47E-33 | 14.89275 | Up | myosin XVB                                               |
| PLEKHH1        | 1.337471 | 3.6E-38  | 2.49E-35 | 15.69134 | Up | pleckstrin homology, MyTH4 and FERM domain containing H1 |
| SNTB1          | 1.336176 | 1.44E-17 | 3.8E-17  | 9.267783 | Up | syntrophin beta 1                                        |
| VLDLR          | 1.33577  | 1.28E-10 | 2.46E-10 | 6.73873  | Up | very low density lipoprotein receptor                    |

|          |          |          |          |          |    |                                                                      |
|----------|----------|----------|----------|----------|----|----------------------------------------------------------------------|
| ARHGEF18 | 1.334008 | 1.65E-20 | 5.37E-20 | 10.24134 | Up | Rho/Rac guanine nucleotide exchange factor 18                        |
| CYP2B6   | 1.332978 | 3.34E-10 | 6.29E-10 | 6.570419 | Up | cytochrome P450 family 2 subfamily B member 6                        |
| CUL9     | 1.332622 | 6.28E-35 | 2.77E-32 | 14.70907 | Up | cullin 9                                                             |
| LRP4     | 1.330979 | 1.15E-24 | 5E-23    | 11.56532 | Up | LDL receptor related protein 4                                       |
| ALS2CL   | 1.326535 | 1.17E-30 | 2.93E-28 | 13.41248 | Up | ALS2 C-terminal like                                                 |
| TMEM132C | 1.324259 | 1.91E-09 | 3.47E-09 | 6.257252 | Up | transmembrane protein 132C                                           |
| GRINA    | 1.323974 | 1.46E-32 | 4.56E-30 | 13.99161 | Up | glutamate ionotropic receptor NMDA type subunit associated protein 1 |
| IGSF9    | 1.323933 | 6.45E-27 | 9.64E-25 | 12.26479 | Up | immunoglobulin superfamily member 9                                  |
| LDLR     | 1.322432 | 1.41E-23 | 5.99E-23 | 11.22282 | Up | low density lipoprotein receptor                                     |
| FYCO1    | 1.320725 | 1.1E-29  | 2.35E-27 | 13.11509 | Up | FYVE and coiled-coil domain containing 1                             |
| SLC25A25 | 1.318164 | 3.2E-29  | 6.63E-27 | 12.97304 | Up | solute carrier family 25 member 25                                   |
| MAP11    | 1.316368 | 5.3E-27  | 8.04E-25 | 12.29117 | Up | microtubule associated protein 11                                    |
| SHROOM3  | 1.316237 | 1.96E-39 | 1.87E-36 | 16.07489 | Up | shroom family member 3                                               |
| ZKSCAN8  | 1.315725 | 6.79E-18 | 1.82E-17 | 9.378237 | Up | zinc finger with KRAB and SCAN domains 8                             |
| NDST1    | 1.315386 | 6.63E-33 | 2.12E-30 | 14.09536 | Up | N-deacetylase and N-sulfotransferase 1                               |
| SARM1    | 1.313233 | 7.17E-22 | 2.5E-21  | 10.68046 | Up | sterile alpha and TIR motif containing 1                             |
| POLG     | 1.313108 | 1.08E-40 | 1.24E-37 | 16.45712 | Up | DNA polymerase gamma, catalytic subunit                              |
| ADAM15   | 1.310967 | 3.23E-39 | 2.8E-36  | 16.00907 | Up | ADAM metallopeptidase domain 15                                      |
| MYORG    | 1.30949  | 1.55E-28 | 2.94E-26 | 12.76346 | Up | myogenesis regulating glycosidase (putative)                         |
| PKP3     | 1.309219 | 2.82E-39 | 2.56E-36 | 16.02694 | Up | plakophilin 3                                                        |
| SLC6A19  | 1.308961 | 6.18E-35 | 2.74E-32 | 14.7112  | Up | solute carrier family 6 member 19                                    |
| PLXNB2   | 1.308813 | 3.42E-43 | 7.1E-40  | 17.21986 | Up | plexin B2                                                            |
| PSD4     | 1.308678 | 7.02E-36 | 3.44E-33 | 14.99738 | Up | pleckstrin and Sec7 domain containing 4                              |
| GRK2     | 1.30789  | 2.8E-33  | 9.65E-31 | 14.20891 | Up | G protein-coupled receptor kinase 2                                  |
| PCSK9    | 1.305073 | 7.2E-11  | 1.4E-10  | 6.83845  | Up | proproteinconvertasesubtilisin/kexin type 9                          |
| SLC22A23 | 1.304428 | 1.31E-32 | 4.12E-30 | 14.00555 | Up | solute carrier family 22 member 23                                   |
| HIC1     | 1.304188 | 4.21E-16 | 1.04E-15 | 8.766818 | Up | HIC ZBTB transcriptional repressor 1                                 |
| MAP3K14  | 1.303126 | 6.8E-28  | 1.18E-25 | 12.56597 | Up | mitogen-activated protein kinase kinasekinase 14                     |
| EPS8L2   | 1.300391 | 8.2E-39  | 6.44E-36 | 15.88634 | Up | EPS8 like 2                                                          |
| TYK2     | 1.300207 | 3.37E-40 | 3.69E-37 | 16.30743 | Up | tyrosine kinase 2                                                    |
| DPP10    | 1.299161 | 8.87E-11 | 1.71E-10 | 6.802442 | Up | dipeptidyl peptidase like 10                                         |
| PLXNB1   | 1.298898 | 2.73E-33 | 9.46E-31 | 14.21223 | Up | plexin B1                                                            |
| IQGAP3   | 1.296364 | 3.44E-10 | 6.46E-10 | 6.565309 | Up | IQ motif containing GTPase activating protein 3                      |
| CAMSAP3  | 1.293495 | 6.11E-40 | 6.43E-37 | 16.22871 | Up | calmodulin regulated spectrin associated protein family member 3     |

|          |          |          |          |          |    |                                                          |
|----------|----------|----------|----------|----------|----|----------------------------------------------------------|
| SFMBT2   | 1.292954 | 4.62E-15 | 1.08E-14 | 8.40284  | Up | Scm like with four mbt domains 2                         |
| ABCA2    | 1.292794 | 2.95E-23 | 1.18E-22 | 11.12119 | Up | ATP binding cassette subfamily A member 2                |
| LZTR1    | 1.29243  | 2.62E-31 | 7.05E-29 | 13.61013 | Up | leucine zipper like transcription regulator 1            |
| CACNA1C  | 1.291878 | 6.62E-13 | 1.41E-12 | 7.621104 | Up | calcium voltage-gated channel subunit alpha1 C           |
| VAV2     | 1.288686 | 4.62E-33 | 1.52E-30 | 14.14292 | Up | vav guanine nucleotide exchange factor 2                 |
| SHC1     | 1.288501 | 3.2E-34  | 1.27E-31 | 14.49473 | Up | SHC adaptor protein 1                                    |
| RNF40    | 1.287602 | 1.46E-35 | 7.09E-33 | 14.90081 | Up | ring finger protein 40                                   |
| ENAM     | 1.286926 | 1.82E-13 | 3.97E-13 | 7.828002 | Up | enamelin                                                 |
| PCDH1    | 1.286291 | 7.85E-35 | 3.43E-32 | 14.67964 | Up | protocadherin 1                                          |
| PLXNA3   | 1.286207 | 6.04E-25 | 5E-23    | 11.65219 | Up | plexin A3                                                |
| ITPKB    | 1.282803 | 4.16E-25 | 4.57E-23 | 11.70265 | Up | inositol-trisphosphate 3-kinase B                        |
| RALGDS   | 1.281353 | 7.51E-34 | 2.78E-31 | 14.3824  | Up | ral guanine nucleotide dissociation stimulator           |
| PHKA1    | 1.281196 | 4.77E-14 | 1.07E-13 | 8.040361 | Up | phosphorylase kinase regulatory subunit alpha 1          |
| JAG1     | 1.275976 | 2.71E-39 | 2.51E-36 | 16.03208 | Up | jagged canonical Notch ligand 1                          |
| CIITA    | 1.27375  | 3.25E-35 | 1.49E-32 | 14.79576 | Up | class II major histocompatibility complex transactivator |
| MROH1    | 1.27353  | 1.25E-36 | 6.89E-34 | 15.22389 | Up | maestro heat like repeat family member 1                 |
| ARHGAP19 | 1.269088 | 1.8E-23  | 7.62E-23 | 11.18914 | Up | Rho GTPase activating protein 19                         |
| OSBPL7   | 1.267914 | 4.47E-39 | 3.66E-36 | 15.96633 | Up | oxysterol binding protein like 7                         |
| ZDHHC11  | 1.267333 | 3.37E-09 | 6.06E-09 | 6.152463 | Up | zinc finger DHHC-type containing 11                      |
| MPRIP    | 1.265858 | 5E-32    | 1.46E-29 | 13.82879 | Up | myosin phosphatase Rho interacting protein               |
| PASK     | 1.264991 | 2.2E-21  | 7.47E-21 | 10.52388 | Up | PAS domain containing serine/threonine kinase            |
| STK36    | 1.264879 | 5.2E-26  | 6.91E-24 | 11.98393 | Up | serine/threonine kinase 36                               |
| PFKFB3   | 1.262301 | 4.44E-24 | 5E-23    | 11.3807  | Up | 6-phosphofructo-2-kinase/fructose-2,6-biphosphatase 3    |
| GPR153   | 1.26165  | 4.33E-25 | 4.72E-23 | 11.69751 | Up | G protein-coupled receptor 153                           |
| HAS3     | 1.261534 | 6.28E-12 | 1.28E-11 | 7.251728 | Up | hyaluronan synthase 3                                    |
| LAMB2    | 1.261435 | 4.05E-32 | 1.19E-29 | 13.85672 | Up | laminin subunit beta 2                                   |
| DMTN     | 1.261079 | 1.27E-17 | 3.35E-17 | 9.286461 | Up | dematin actin binding protein                            |
| MYO1D    | 1.259221 | 7.03E-36 | 3.44E-33 | 14.99716 | Up | myosin ID                                                |
| FZD1     | 1.259099 | 1.11E-27 | 1.86E-25 | 12.50084 | Up | frizzled class receptor 1                                |
| ELF4     | 1.258154 | 1.47E-30 | 3.64E-28 | 13.38196 | Up | E74 like ETS transcription factor 4                      |
| MYBBP1A  | 1.25632  | 8.84E-22 | 3.06E-21 | 10.65133 | Up | MYB binding protein 1a                                   |
| ZNF710   | 1.254845 | 2.75E-19 | 8.34E-19 | 9.841749 | Up | zinc finger protein 710                                  |
| TNKS1BP1 | 1.254473 | 1.13E-27 | 1.89E-25 | 12.49852 | Up | tankyrase 1 binding protein 1                            |
| CARNS1   | 1.253973 | 7.75E-12 | 1.57E-11 | 7.216839 | Up | carnosine synthase 1                                     |

|          |          |          |          |          |    |                                                                     |
|----------|----------|----------|----------|----------|----|---------------------------------------------------------------------|
| LAMC1    | 1.252621 | 1.45E-09 | 2.65E-09 | 6.307249 | Up | laminin subunit gamma 1                                             |
| SNX33    | 1.251871 | 2.14E-30 | 5.11E-28 | 13.33198 | Up | sorting nexin 33                                                    |
| ZNF592   | 1.24988  | 5.51E-36 | 2.74E-33 | 15.02929 | Up | zinc finger protein 592                                             |
| SBNO2    | 1.249577 | 6.84E-32 | 1.96E-29 | 13.7875  | Up | strawberry notch homolog 2                                          |
| CGN      | 1.247998 | 1.76E-35 | 8.38E-33 | 14.8766  | Up | cingulin                                                            |
| ZNF653   | 1.245497 | 1.36E-16 | 3.44E-16 | 8.936023 | Up | zinc finger protein 653                                             |
| SSTR1    | 1.245492 | 1.11E-26 | 1.6E-24  | 12.19184 | Up | somatostatin receptor 1                                             |
| CDAN1    | 1.24513  | 4.83E-33 | 1.58E-30 | 14.13706 | Up | codanin 1                                                           |
| NUP188   | 1.241392 | 1.62E-27 | 2.63E-25 | 12.45005 | Up | nucleoporin 188                                                     |
| ADAMTS14 | 1.240863 | 4.13E-09 | 7.39E-09 | 6.114986 | Up | ADAM metalloproteinase with thrombospondin type 1 motif 14          |
| TMEM94   | 1.240715 | 7.06E-37 | 4.23E-34 | 15.29966 | Up | transmembrane protein 94                                            |
| MVB12B   | 1.240662 | 8.29E-22 | 2.88E-21 | 10.66026 | Up | multivesicular body subunit 12B                                     |
| PTK7     | 1.239845 | 1.52E-10 | 2.9E-10  | 6.709082 | Up | protein tyrosine kinase 7 (inactive)                                |
| LDHAL6B  | 1.239622 | 6.55E-13 | 1.39E-12 | 7.622654 | Up | lactate dehydrogenase A like 6B                                     |
| KL       | 1.239394 | 3.36E-17 | 8.69E-17 | 9.143759 | Up | klotho                                                              |
| ZBTB7C   | 1.237497 | 1.65E-13 | 3.59E-13 | 7.844345 | Up | zinc finger and BTB domain containing 7C                            |
| SPECC1L  | 1.237399 | 1.5E-20  | 4.91E-20 | 10.25428 | Up | sperm antigen with calponin homology and coiled-coil domains 1 like |
| IRGQ     | 1.234884 | 5.33E-20 | 1.7E-19  | 10.07556 | Up | immunity related GTPase Q                                           |
| ADM2     | 1.233725 | 2.77E-19 | 8.4E-19  | 9.840727 | Up | adrenomedullin 2                                                    |
| WNT9B    | 1.23253  | 3.44E-12 | 7.06E-12 | 7.351847 | Up | Wnt family member 9B                                                |
| ANK1     | 1.232382 | 2E-12    | 4.15E-12 | 7.441065 | Up | ankyrin 1                                                           |
| SCRN1    | 1.232101 | 4.85E-11 | 9.47E-11 | 6.90643  | Up | secernin 1                                                          |
| TFE3     | 1.228791 | 1.77E-36 | 9.55E-34 | 15.17846 | Up | transcription factor binding to IGHM enhancer 3                     |
| PRPF8    | 1.227812 | 1.12E-36 | 6.24E-34 | 15.23939 | Up | pre-mRNA processing factor 8                                        |
| KLHL25   | 1.227723 | 8.09E-29 | 1.6E-26  | 12.84985 | Up | kelch like family member 25                                         |
| SV2B     | 1.227027 | 8.37E-09 | 1.48E-08 | 5.982765 | Up | synaptic vesicle glycoprotein 2B                                    |
| ZNF853   | 1.226838 | 3.27E-11 | 6.43E-11 | 6.973936 | Up | zinc finger protein 853                                             |
| CHRNA2   | 1.22677  | 4.19E-11 | 8.19E-11 | 6.931658 | Up | cholinergic receptor nicotinic beta 2 subunit                       |
| USP19    | 1.226667 | 8.2E-38  | 5.42E-35 | 15.58298 | Up | ubiquitin specific peptidase 19                                     |
| ADCY3    | 1.225283 | 6.73E-12 | 1.37E-11 | 7.240358 | Up | adenylatecyclase 3                                                  |
| SNAPC4   | 1.223639 | 1.14E-27 | 1.9E-25  | 12.49725 | Up | small nuclear RNA activating complex polypeptide 4                  |
| HDAC6    | 1.22202  | 3.15E-35 | 1.47E-32 | 14.7999  | Up | histone deacetylase 6                                               |
| MALRD1   | 1.221652 | 6.42E-47 | 4.15E-43 | 18.36519 | Up | MAM and LDL receptor class A domain containing 1                    |
| TRAF7    | 1.221208 | 3.26E-35 | 1.49E-32 | 14.79549 | Up | TNF receptor associated factor 7                                    |



|          |          |          |          |          |    |                                                                                  |
|----------|----------|----------|----------|----------|----|----------------------------------------------------------------------------------|
| PARP10   | 1.219068 | 1.24E-34 | 5.13E-32 | 14.62    | Up | poly(ADP-ribose) polymerase family member 10                                     |
| NOS2     | 1.219044 | 2.52E-11 | 4.98E-11 | 7.018494 | Up | nitric oxide synthase 2                                                          |
| COL17A1  | 1.218573 | 2.25E-22 | 8.22E-22 | 10.84112 | Up | collagen type XVII alpha 1 chain                                                 |
| MEGF6    | 1.218567 | 1.46E-12 | 3.05E-12 | 7.49266  | Up | multiple EGF like domains 6                                                      |
| FASN     | 1.218082 | 4.97E-16 | 1.22E-15 | 8.741984 | Up | fatty acid synthase                                                              |
| CAD      | 1.217215 | 1.87E-21 | 6.36E-21 | 10.54678 | Up | carbamoyl-phosphate synthetase 2, aspartate transcarbamylase, and dihydroorotase |
| SREBF1   | 1.217108 | 2.09E-28 | 3.86E-26 | 12.72331 | Up | sterol regulatory element binding transcription factor 1                         |
| CHRNA2   | 1.216726 | 1.36E-09 | 2.49E-09 | 6.319215 | Up | cholinergic receptor nicotinic alpha 2 subunit                                   |
| PIP5K1C  | 1.216458 | 1.21E-30 | 3.02E-28 | 13.40768 | Up | phosphatidylinositol-4-phosphate 5-kinase type 1 gamma                           |
| PLD2     | 1.215839 | 3.07E-23 | 1.23E-22 | 11.11572 | Up | phospholipase D2                                                                 |
| IGSF10   | 1.215559 | 1.5E-09  | 2.74E-09 | 6.300958 | Up | immunoglobulin superfamily member 10                                             |
| KCNK2    | 1.215082 | 1.68E-09 | 3.07E-09 | 6.280347 | Up | potassium two pore domain channel subfamily K member 2                           |
| NOTCH1   | 1.212654 | 9.38E-22 | 3.24E-21 | 10.64307 | Up | notch receptor 1                                                                 |
| ATP8B2   | 1.21031  | 3.17E-23 | 1.27E-22 | 11.1114  | Up | ATPase phospholipid transporting 8B2                                             |
| MCM3AP   | 1.210172 | 9.31E-34 | 3.4E-31  | 14.35414 | Up | minichromosome maintenance complex component 3 associated protein                |
| CARD14   | 1.208591 | 1.09E-10 | 2.1E-10  | 6.766595 | Up | caspase recruitment domain family member 14                                      |
| CC2D1B   | 1.208178 | 5.83E-30 | 1.33E-27 | 13.19932 | Up | coiled-coil and C2 domain containing 1B                                          |
| SH3TC1   | 1.20809  | 9.65E-15 | 2.22E-14 | 8.289424 | Up | SH3 domain and tetratricopeptide repeats 1                                       |
| DMWD     | 1.206894 | 9.8E-26  | 1.25E-23 | 11.89841 | Up | DM1 locus, WD repeat containing                                                  |
| UPF1     | 1.206296 | 1.98E-38 | 1.42E-35 | 15.7701  | Up | UPF1 RNA helicase and ATPase                                                     |
| ARHGEF7  | 1.205138 | 5.5E-37  | 3.37E-34 | 15.33235 | Up | Rho guanine nucleotide exchange factor 7                                         |
| PML      | 1.204509 | 4.03E-37 | 2.52E-34 | 15.37338 | Up | promyelocytic leukemia                                                           |
| NEURL4   | 1.204114 | 1.54E-28 | 2.93E-26 | 12.76422 | Up | neuralized E3 ubiquitin protein ligase 4                                         |
| PRDM15   | 1.203758 | 1.09E-17 | 2.89E-17 | 9.309028 | Up | PR/SET domain 15                                                                 |
| TRPM4    | 1.20322  | 3.36E-42 | 5.58E-39 | 16.91687 | Up | transient receptor potential cation channel subfamily M member 4                 |
| ADAMTS13 | 1.203122 | 2.39E-28 | 4.3E-26  | 12.70564 | Up | ADAM metalloproteinase with thrombospondin type 1 motif 13                       |
| FRMD8    | 1.202153 | 4.97E-27 | 7.61E-25 | 12.29971 | Up | FERM domain containing 8                                                         |
| TAOK2    | 1.201121 | 1.64E-41 | 2.27E-38 | 16.7069  | Up | TAO kinase 2                                                                     |
| ITGA3    | 1.201072 | 9.94E-38 | 6.43E-35 | 15.55758 | Up | integrin subunit alpha 3                                                         |
| PTPRH    | 1.200925 | 2.84E-36 | 1.49E-33 | 15.11657 | Up | protein tyrosine phosphatase receptor type H                                     |
| ZNF335   | 1.200858 | 4.1E-32  | 1.2E-29  | 13.8552  | Up | zinc finger protein 335                                                          |
| ERBB2    | 1.200799 | 2.47E-44 | 7.56E-41 | 17.56945 | Up | erb-b2 receptor tyrosine kinase 2                                                |
| RAPGEF4  | 1.200596 | 2.87E-14 | 6.47E-14 | 8.120065 | Up | Rap guanine nucleotide exchange factor 4                                         |
| SCARF2   | 1.199636 | 1.29E-15 | 3.12E-15 | 8.59762  | Up | scavenger receptor class F member 2                                              |

|              |          |          |          |          |    |                                                           |
|--------------|----------|----------|----------|----------|----|-----------------------------------------------------------|
| INPP5E       | 1.196891 | 1.47E-31 | 4.04E-29 | 13.68623 | Up | inositol polyphosphate-5-phosphatase E                    |
| SETD7        | 1.196875 | 1.47E-10 | 2.81E-10 | 6.714661 | Up | SET domain containing 7, histone lysine methyltransferase |
| CNOT3        | 1.196802 | 3.95E-35 | 1.78E-32 | 14.77014 | Up | CCR4-NOT transcription complex subunit 3                  |
| GMIP         | 1.196017 | 1.5E-34  | 6.17E-32 | 14.594   | Up | GEM interacting protein                                   |
| CDC42EP4     | 1.195596 | 3.39E-32 | 1E-29    | 13.88009 | Up | CDC42 effector protein 4                                  |
| INAVA        | 1.19543  | 7.04E-42 | 1.05E-38 | 16.81878 | Up | innate immunity activator                                 |
| MAP3K10      | 1.195339 | 5.38E-15 | 1.26E-14 | 8.37957  | Up | mitogen-activated protein kinase kinasekinase 10          |
| DENND4B      | 1.195072 | 9.51E-32 | 2.7E-29  | 13.74406 | Up | DENN domain containing 4B                                 |
| TMEM63B      | 1.192941 | 1.01E-31 | 2.86E-29 | 13.73568 | Up | transmembrane protein 63B                                 |
| SLC4A2       | 1.192654 | 2.36E-26 | 3.28E-24 | 12.09012 | Up | solute carrier family 4 member 2                          |
| ATP9A        | 1.191902 | 3.7E-31  | 9.6E-29  | 13.56461 | Up | ATPase phospholipid transporting 9A (putative)            |
| PLPPR5       | 1.188892 | 2.65E-09 | 4.8E-09  | 6.196512 | Up | phospholipid phosphatase related 5                        |
| MYO7A        | 1.187845 | 4.05E-15 | 9.52E-15 | 8.42328  | Up | myosin VIIA                                               |
| DNHD1        | 1.187333 | 2.02E-23 | 8.36E-23 | 11.17312 | Up | dynein heavy chain domain 1                               |
| BTBD11       | 1.186279 | 1.03E-13 | 2.27E-13 | 7.918826 | Up | BTB domain containing 11                                  |
| SMURF1       | 1.184298 | 2.11E-34 | 8.54E-32 | 14.54934 | Up | SMAD specific E3 ubiquitin protein ligase 1               |
| EPAS1        | 1.184006 | 2.93E-33 | 1E-30    | 14.20314 | Up | endothelial PAS domain protein 1                          |
| DACT1        | 1.183651 | 2.97E-09 | 5.35E-09 | 6.176045 | Up | dishevelled binding antagonist of beta catenin 1          |
| PPM1E        | 1.182509 | 6.78E-11 | 1.32E-10 | 6.848862 | Up | protein phosphatase, Mg2+/Mn2+ dependent 1E               |
| SKIV2L       | 1.181866 | 1.25E-27 | 2.08E-25 | 12.48445 | Up | Ski2 like RNA helicase                                    |
| SNRNP200     | 1.180972 | 3.12E-39 | 2.77E-36 | 16.01385 | Up | small nuclear ribonucleoprotein U5 subunit 200            |
| PLXNA2       | 1.180269 | 1.8E-43  | 4.37E-40 | 17.30499 | Up | plexin A2                                                 |
| ADGRG2       | 1.179694 | 1.83E-08 | 3.17E-08 | 5.83473  | Up | adhesion G protein-coupled receptor G2                    |
| CDC42BPG     | 1.178683 | 1.81E-33 | 6.41E-31 | 14.26679 | Up | CDC42 binding protein kinase gamma                        |
| PNPLA6       | 1.178373 | 6.56E-26 | 8.59E-24 | 11.95262 | Up | patatin like phospholipase domain containing 6            |
| HYOU1        | 1.177352 | 5.06E-20 | 1.61E-19 | 10.08278 | Up | hypoxia up-regulated 1                                    |
| NATD1        | 1.176898 | 5.21E-17 | 1.34E-16 | 9.07884  | Up | N-acetyltransferase domain containing 1                   |
| LOC100507403 | 1.175074 | 1.08E-11 | 2.17E-11 | 7.161211 | Up | uncharacterized LOC100507403                              |
| POLRMT       | 1.173917 | 2.15E-36 | 1.15E-33 | 15.15308 | Up | RNA polymerase mitochondrial                              |
| ZC3H3        | 1.17348  | 6.31E-32 | 1.82E-29 | 13.79819 | Up | zinc finger CCCH-type containing 3                        |
| CCDC88B      | 1.172998 | 8.24E-35 | 3.58E-32 | 14.67326 | Up | coiled-coil domain containing 88B                         |
| MAST2        | 1.172945 | 2.37E-35 | 1.12E-32 | 14.83754 | Up | microtubule associated serine/threonine kinase 2          |
| PRAG1        | 1.172612 | 3.74E-28 | 6.61E-26 | 12.64582 | Up | PEAK1 related, kinase-activating pseudokinase 1           |
| TBC1D9B      | 1.171279 | 3.44E-34 | 1.32E-31 | 14.48536 | Up | TBC1 domain family member 9B                              |

|           |          |          |          |          |    |                                                                  |
|-----------|----------|----------|----------|----------|----|------------------------------------------------------------------|
| CIC       | 1.171059 | 3.85E-21 | 1.29E-20 | 10.4458  | Up | capicua transcriptional repressor                                |
| UNC13B    | 1.170932 | 8.18E-23 | 3.1E-22  | 10.98097 | Up | unc-13 homolog B                                                 |
| FAM83E    | 1.169242 | 3.27E-39 | 2.8E-36  | 16.00729 | Up | family with sequence similarity 83 member E                      |
| APIB1     | 1.16866  | 3.25E-34 | 1.27E-31 | 14.49262 | Up | adaptor related protein complex 1 subunit beta 1                 |
| PLXNA4    | 1.168473 | 2.22E-10 | 4.21E-10 | 6.642336 | Up | plexin A4                                                        |
| RAP1GAP2  | 1.168419 | 4.44E-16 | 1.09E-15 | 8.759045 | Up | RAP1 GTPase activating protein 2                                 |
| CTNND1    | 1.167602 | 8.91E-39 | 6.91E-36 | 15.87537 | Up | catenin delta 1                                                  |
| TTC7A     | 1.166221 | 3.69E-31 | 9.6E-29  | 13.5649  | Up | tetratricopeptide repeat domain 7A                               |
| TIAM2     | 1.16592  | 4.14E-43 | 8.3E-40  | 17.19444 | Up | TIAM Rac1 associated GEF 2                                       |
| ADCY6     | 1.165055 | 6.76E-27 | 1.01E-24 | 12.25844 | Up | adenylatecyclase 6                                               |
| ZNF585B   | 1.16487  | 2.09E-25 | 2.51E-23 | 11.79634 | Up | zinc finger protein 585B                                         |
| HDAC5     | 1.163942 | 7.23E-37 | 4.25E-34 | 15.29643 | Up | histone deacetylase 5                                            |
| ZAP70     | 1.163763 | 6.69E-15 | 1.56E-14 | 8.345948 | Up | zeta chain of T cell receptor associated protein kinase 70       |
| PER3      | 1.162951 | 1.5E-18  | 4.24E-18 | 9.597729 | Up | period circadian regulator 3                                     |
| TMEM132A  | 1.161006 | 4.78E-10 | 8.94E-10 | 6.50666  | Up | transmembrane protein 132A                                       |
| ABCA7     | 1.160993 | 4.76E-21 | 1.59E-20 | 10.41605 | Up | ATP binding cassette subfamily A member 7                        |
| MINK1     | 1.157817 | 3.25E-30 | 7.6E-28  | 13.27675 | Up | misshapen like kinase 1                                          |
| FAAP100   | 1.157425 | 6.9E-30  | 1.54E-27 | 13.17689 | Up | FA core complex associated protein 100                           |
| LINC00639 | 1.156611 | 9.92E-09 | 1.75E-08 | 5.950806 | Up | long intergenic non-protein coding RNA 639                       |
| SH3RF3    | 1.155606 | 1.62E-13 | 3.54E-13 | 7.846718 | Up | SH3 domain containing ring finger 3                              |
| EDEM1     | 1.155075 | 7.27E-30 | 1.61E-27 | 13.17012 | Up | ER degradation enhancing alpha-mannosidase like protein 1        |
| CIT       | 1.154649 | 2.72E-10 | 5.13E-10 | 6.606877 | Up | citron rho-interacting serine/threonine kinase                   |
| GPR55     | 1.154308 | 3.3E-11  | 6.5E-11  | 6.972117 | Up | G protein-coupled receptor 55                                    |
| DOCK2     | 1.152764 | 3.42E-16 | 8.49E-16 | 8.798006 | Up | dedicator of cytokinesis 2                                       |
| CSRNP1    | 1.152225 | 3.56E-30 | 8.29E-28 | 13.26471 | Up | cysteine and serine rich nuclear protein 1                       |
| IP6K1     | 1.151613 | 3.95E-35 | 1.78E-32 | 14.76992 | Up | inositol hexakisphosphate kinase 1                               |
| SUN2      | 1.150709 | 3.08E-33 | 1.05E-30 | 14.1965  | Up | Sad1 and UNC84 domain containing 2                               |
| TRPM2     | 1.150629 | 1.58E-12 | 3.3E-12  | 7.479388 | Up | transient receptor potential cation channel subfamily M member 2 |
| NRBP2     | 1.150419 | 1.45E-24 | 5E-23    | 11.53317 | Up | nuclear receptor binding protein 2                               |
| TEF       | 1.149278 | 3.54E-17 | 9.15E-17 | 9.135943 | Up | TEF transcription factor, PAR bZIP family member                 |
| ANKFY1    | 1.148282 | 3.67E-31 | 9.6E-29  | 13.56565 | Up | ankyrin repeat and FYVE domain containing 1                      |
| FOSL2     | 1.147624 | 1.12E-33 | 4.04E-31 | 14.33012 | Up | FOS like 2, AP-1 transcription factor subunit                    |
| FOXJ2     | 1.147008 | 1.5E-29  | 3.17E-27 | 13.07353 | Up | forkhead box J2                                                  |
| SNX30     | 1.14559  | 3.57E-33 | 1.2E-30  | 14.17714 | Up | sorting nexin family member 30                                   |

|              |          |          |          |          |    |                                                                 |
|--------------|----------|----------|----------|----------|----|-----------------------------------------------------------------|
| MYRF         | 1.14547  | 6.07E-29 | 1.22E-26 | 12.88815 | Up | myelin regulatory factor                                        |
| ENGASE       | 1.145247 | 2.41E-25 | 2.83E-23 | 11.77649 | Up | endo-beta-N-acetylglucosaminidase                               |
| YBX2         | 1.144879 | 3.61E-23 | 1.44E-22 | 11.09367 | Up | Y-box binding protein 2                                         |
| CHRM4        | 1.143298 | 6.6E-10  | 1.23E-09 | 6.44916  | Up | cholinergic receptor muscarinic 4                               |
| PLEKHG1      | 1.142759 | 1.23E-21 | 4.21E-21 | 10.60585 | Up | pleckstrin homology and RhoGEF domain containing G1             |
| TCF23        | 1.142327 | 3.11E-11 | 6.13E-11 | 6.982164 | Up | transcription factor 23                                         |
| CPD          | 1.142088 | 3.07E-32 | 9.15E-30 | 13.89343 | Up | carboxypeptidase D                                              |
| EPHA10       | 1.141639 | 3.24E-12 | 6.67E-12 | 7.361431 | Up | EPH receptor A10                                                |
| CASR         | 1.141636 | 3.57E-09 | 6.42E-09 | 6.141708 | Up | calcium sensing receptor                                        |
| SLC6A6       | 1.140323 | 2.48E-30 | 5.88E-28 | 13.31289 | Up | solute carrier family 6 member 6                                |
| LOC100507516 | 1.140264 | 5.2E-13  | 1.11E-12 | 7.659922 | Up | uncharacterized LOC100507516                                    |
| CPLX2        | 1.139239 | 1.7E-07  | 2.8E-07  | 5.396063 | Up | complexin 2                                                     |
| DISP3        | 1.138523 | 4.67E-09 | 8.33E-09 | 6.092243 | Up | dispatched RND transporter family member 3                      |
| GBF1         | 1.138152 | 1.02E-39 | 1.01E-36 | 16.16093 | Up | golgibrefeldin A resistant guanine nucleotide exchange factor 1 |
| RASAL1       | 1.137939 | 2.2E-13  | 4.77E-13 | 7.798147 | Up | RAS protein activator like 1                                    |
| SLC30A1      | 1.137522 | 1.24E-39 | 1.2E-36  | 16.13535 | Up | solute carrier family 30 member 1                               |
| CDK18        | 1.136852 | 1.42E-18 | 4.02E-18 | 9.605942 | Up | cyclin dependent kinase 18                                      |
| MARCHF4      | 1.136531 | 5.61E-10 | 1.05E-09 | 6.478141 | Up | membrane associated ring-CH-type finger 4                       |
| TCF3         | 1.135875 | 1.47E-27 | 2.41E-25 | 12.46284 | Up | transcription factor 3                                          |
| CLTC         | 1.135875 | 1.87E-30 | 4.49E-28 | 13.35016 | Up | clathrin heavy chain                                            |
| PSMD6-AS2    | 1.135025 | 1.75E-14 | 3.98E-14 | 8.197224 | Up | PSMD6 antisense RNA 2                                           |
| DGKD         | 1.134418 | 6.7E-29  | 1.34E-26 | 12.87488 | Up | diacylglycerol kinase delta                                     |
| CAND2        | 1.134332 | 1.54E-09 | 2.81E-09 | 6.296393 | Up | cullin associated and neddylation dissociated 2 (putative)      |
| GSTM1        | 1.134331 | 0.000525 | 0.000708 | 3.51758  | Up | glutathione S-transferase mu 1                                  |
| CCDC120      | 1.133708 | 1.18E-24 | 5E-23    | 11.56179 | Up | coiled-coil domain containing 120                               |
| U2AF1L5      | 1.132326 | 1.97E-10 | 3.74E-10 | 6.663731 | Up | U2 small nuclear RNA auxiliary factor 1 like 5                  |
| SNX19        | 1.131879 | 2.04E-29 | 4.26E-27 | 13.03319 | Up | sorting nexin 19                                                |
| KRT73-AS1    | 1.131867 | 1.13E-11 | 2.27E-11 | 7.153696 | Up | KRT73 antisense RNA 1                                           |
| CLCN7        | 1.131542 | 6.21E-32 | 1.8E-29  | 13.80037 | Up | chloride voltage-gated channel 7                                |
| PDE3A        | 1.131007 | 4.95E-19 | 1.46E-18 | 9.757323 | Up | phosphodiesterase 3A                                            |
| TEN1-CDK3    | 1.130859 | 9.45E-13 | 1.99E-12 | 7.56331  | Up | TEN1-CDK3 readthrough (NMD candidate)                           |
| TOM1L2       | 1.129347 | 5.26E-31 | 1.35E-28 | 13.51803 | Up | target of myb1 like 2 membrane trafficking protein              |
| FAM166A      | 1.128474 | 1.27E-17 | 3.36E-17 | 9.286335 | Up | family with sequence similarity 166 member A                    |
| KIFC3        | 1.128205 | 1.52E-21 | 5.19E-21 | 10.57592 | Up | kinesin family member C3                                        |

|          |          |          |          |          |    |                                                     |
|----------|----------|----------|----------|----------|----|-----------------------------------------------------|
| PLA2G4F  | 1.128166 | 2.88E-31 | 7.69E-29 | 13.5976  | Up | phospholipase A2 group IVF                          |
| PPL      | 1.127921 | 2.33E-20 | 7.54E-20 | 10.19262 | Up | periplakin                                          |
| LAMA5    | 1.127847 | 2.33E-10 | 4.41E-10 | 6.634016 | Up | laminin subunit alpha 5                             |
| NUP205   | 1.126368 | 8.45E-25 | 5E-23    | 11.60668 | Up | nucleoporin 205                                     |
| FBXO41   | 1.125839 | 3.66E-10 | 6.87E-10 | 6.554331 | Up | F-box protein 41                                    |
| NDOR1    | 1.125304 | 1.02E-27 | 1.73E-25 | 12.512   | Up | NADPH dependent diflavinoxidoreductase 1            |
| LMF2     | 1.125202 | 4.1E-36  | 2.09E-33 | 15.06812 | Up | lipase maturation factor 2                          |
| NLRP6    | 1.12352  | 9.07E-29 | 1.78E-26 | 12.83468 | Up | NLR family pyrin domain containing 6                |
| GPT      | 1.123027 | 6.61E-30 | 1.48E-27 | 13.18266 | Up | glutamic--pyruvic transaminase                      |
| FZR1     | 1.122309 | 3.64E-31 | 9.59E-29 | 13.56645 | Up | fizzy and cell division cycle 20 related 1          |
| RAB35    | 1.121888 | 3.76E-21 | 1.26E-20 | 10.4493  | Up | RAB35, member RAS oncogene family                   |
| PDZD7    | 1.121638 | 1.93E-22 | 7.08E-22 | 10.86244 | Up | PDZ domain containing 7                             |
| SLC25A22 | 1.121487 | 5.12E-22 | 1.8E-21  | 10.72722 | Up | solute carrier family 25 member 22                  |
| ARID3B   | 1.121461 | 9.19E-30 | 1.99E-27 | 13.13899 | Up | AT-rich interaction domain 3B                       |
| DCTN1    | 1.120671 | 7.16E-31 | 1.83E-28 | 13.47717 | Up | dynactin subunit 1                                  |
| ATP13A3  | 1.12016  | 6.69E-25 | 5E-23    | 11.63834 | Up | ATPase 13A3                                         |
| PLEKHN1  | 1.120105 | 3.41E-11 | 6.7E-11  | 6.96665  | Up | pleckstrin homology domain containing N1            |
| WDR90    | 1.119524 | 3.94E-24 | 5E-23    | 11.39697 | Up | WD repeat domain 90                                 |
| ZBTB40   | 1.118796 | 1.83E-25 | 2.23E-23 | 11.81398 | Up | zinc finger and BTB domain containing 40            |
| DOCK9    | 1.118672 | 8.55E-27 | 1.26E-24 | 12.22688 | Up | dedicator of cytokinesis 9                          |
| PAN2     | 1.117687 | 2.34E-28 | 4.24E-26 | 12.7085  | Up | poly(A) specific ribonuclease subunit PAN2          |
| SEC24C   | 1.117384 | 1.13E-29 | 2.42E-27 | 13.11093 | Up | SEC24 homolog C, COPII coat complex component       |
| CDHR2    | 1.117294 | 1.12E-30 | 2.84E-28 | 13.41775 | Up | cadherin related family member 2                    |
| PLEKHM1  | 1.117187 | 1.76E-32 | 5.4E-30  | 13.96644 | Up | pleckstrin homology and RUN domain containing M1    |
| CAMTA2   | 1.115108 | 1.42E-27 | 2.35E-25 | 12.46718 | Up | calmodulin binding transcription activator 2        |
| LRP5     | 1.115084 | 5.9E-30  | 1.34E-27 | 13.1978  | Up | LDL receptor related protein 5                      |
| ARNT2    | 1.114843 | 6.02E-12 | 1.22E-11 | 7.25892  | Up | aryl hydrocarbon receptor nuclear translocator 2    |
| CLSTN3   | 1.114691 | 1.92E-17 | 5.01E-17 | 9.226366 | Up | calsyntenin 3                                       |
| LINGO1   | 1.11432  | 6.24E-12 | 1.27E-11 | 7.252917 | Up | leucine rich repeat and Ig domain containing 1      |
| FCHSD1   | 1.113723 | 1.06E-20 | 3.47E-20 | 10.30395 | Up | FCH and double SH3 domains 1                        |
| AGRN     | 1.113599 | 1.67E-22 | 6.13E-22 | 10.88277 | Up | agrin                                               |
| PIK3AP1  | 1.11299  | 2.45E-12 | 5.07E-12 | 7.407609 | Up | phosphoinositide-3-kinase adaptor protein 1         |
| SPTBN1   | 1.112327 | 2.11E-31 | 5.78E-29 | 13.63843 | Up | spectrin beta, non-erythrocytic 1                   |
| PLEKHG4  | 1.11213  | 2.22E-12 | 4.6E-12  | 7.423975 | Up | pleckstrin homology and RhoGEF domain containing G4 |

|         |          |          |          |          |      |                                                             |
|---------|----------|----------|----------|----------|------|-------------------------------------------------------------|
| IFI44L  | 1.112023 | 3.64E-06 | 5.59E-06 | 4.747136 | Up   | interferon induced protein 44 like                          |
| XIST    | -3.57042 | 3.52E-15 | 8.31E-15 | -8.44462 | Down | X inactive specific transcript                              |
| S100A9  | -2.65966 | 9.95E-14 | 2.19E-13 | -7.92433 | Down | S100 calcium binding protein A9                             |
| MNDA    | -2.49959 | 4.16E-11 | 8.14E-11 | -6.93277 | Down | myeloid cell nuclear differentiation antigen                |
| SELL    | -2.44498 | 1.63E-11 | 3.25E-11 | -7.09215 | Down | selectin L                                                  |
| FPR1    | -2.42044 | 2.81E-11 | 5.55E-11 | -6.99963 | Down | formyl peptide receptor 1                                   |
| S100A8  | -2.30177 | 3.64E-11 | 7.14E-11 | -6.95557 | Down | S100 calcium binding protein A8                             |
| IL1R2   | -2.18286 | 2.43E-19 | 7.45E-19 | -9.85929 | Down | interleukin 1 receptor type 2                               |
| FCGR3B  | -2.16931 | 2.73E-10 | 5.15E-10 | -6.6063  | Down | Fc fragment of IgG receptor IIIb                            |
| CLEC4E  | -2.14996 | 6.04E-15 | 1.41E-14 | -8.36178 | Down | C-type lectin domain family 4 member E                      |
| SPINK5  | -2.08897 | 6.86E-08 | 1.16E-07 | -5.57709 | Down | serine peptidase inhibitor, Kazal type 5                    |
| CXCR1   | -2.06326 | 2.56E-12 | 5.29E-12 | -7.40053 | Down | C-X-C motif chemokine receptor 1                            |
| S100A12 | -1.95157 | 3.17E-10 | 5.98E-10 | -6.57932 | Down | S100 calcium binding protein A12                            |
| AQP9    | -1.92229 | 1.86E-10 | 3.54E-10 | -6.67337 | Down | aquaporin 9                                                 |
| TREM1   | -1.89896 | 1.62E-11 | 3.22E-11 | -7.09344 | Down | triggering receptor expressed on myeloid cells 1            |
| BASP1   | -1.84809 | 2.6E-12  | 5.37E-12 | -7.39794 | Down | brain abundant membrane attached signal protein 1           |
| RGS18   | -1.83021 | 6.46E-17 | 1.65E-16 | -9.04689 | Down | regulator of G protein signaling 18                         |
| TYROBP  | -1.79113 | 3.8E-15  | 8.96E-15 | -8.43274 | Down | TYRO protein tyrosine kinase binding protein                |
| BCL2A1  | -1.78755 | 7.33E-13 | 1.55E-12 | -7.60447 | Down | BCL2 related protein A1                                     |
| CSF3R   | -1.7864  | 4.52E-11 | 8.84E-11 | -6.91842 | Down | colony stimulating factor 3 receptor                        |
| FCGR2A  | -1.76976 | 6.33E-16 | 1.55E-15 | -8.70563 | Down | Fc fragment of IgG receptor IIa                             |
| FPR2    | -1.76785 | 5.05E-11 | 9.85E-11 | -6.89965 | Down | formyl peptide receptor 2                                   |
| LST1    | -1.75056 | 6.17E-13 | 1.31E-12 | -7.63239 | Down | leukocyte specific transcript 1                             |
| UGT2B17 | -1.73106 | 1.67E-09 | 3.05E-09 | -6.28126 | Down | UDP glucuronosyltransferase family 2 member B17             |
| GNAT3   | -1.7061  | 1.04E-16 | 2.63E-16 | -8.97661 | Down | G protein subunit alpha transducin 3                        |
| OR51E1  | -1.69262 | 7.95E-11 | 1.54E-10 | -6.82145 | Down | olfactory receptor family 51 subfamily E member 1           |
| MMP9    | -1.68728 | 6.85E-10 | 1.27E-09 | -6.44241 | Down | matrix metalloproteinase 9                                  |
| RIPOR2  | -1.6709  | 3.33E-10 | 6.27E-10 | -6.571   | Down | RHO family interacting cell polarization regulator 2        |
| CXCL8   | -1.63914 | 4.6E-07  | 7.41E-07 | -5.1916  | Down | C-X-C motif chemokine ligand 8                              |
| PYGL    | -1.63405 | 2.33E-17 | 6.06E-17 | -9.19781 | Down | glycogen phosphorylase L                                    |
| CMYA5   | -1.58592 | 2.01E-13 | 4.37E-13 | -7.8125  | Down | cardiomyopathy associated 5                                 |
| PLA2G2A | -1.57032 | 3.53E-16 | 8.74E-16 | -8.79354 | Down | phospholipase A2 group IIA                                  |
| KCNJ15  | -1.56946 | 6.57E-12 | 1.33E-11 | -7.24437 | Down | potassium inwardly rectifying channel subfamily J member 15 |
| ADGRE3  | -1.54704 | 1.48E-14 | 3.38E-14 | -8.22322 | Down | adhesion G protein-coupled receptor E3                      |

|           |          |          |          |          |      |                                                            |
|-----------|----------|----------|----------|----------|------|------------------------------------------------------------|
| CXCR2     | -1.54671 | 1.09E-11 | 2.19E-11 | -7.16002 | Down | C-X-C motif chemokine receptor 2                           |
| RGS13     | -1.54387 | 2.18E-15 | 5.21E-15 | -8.51774 | Down | regulator of G protein signaling 13                        |
| BMX       | -1.53703 | 2.83E-19 | 8.59E-19 | -9.83734 | Down | BMX non-receptor tyrosine kinase                           |
| HPGDS     | -1.52735 | 9.32E-14 | 2.05E-13 | -7.93473 | Down | hematopoietic prostaglandin D synthase                     |
| PADI4     | -1.52008 | 8.94E-11 | 1.73E-10 | -6.80114 | Down | peptidyl arginine deiminase 4                              |
| ALOX5AP   | -1.5186  | 1.26E-24 | 5E-23    | -11.5524 | Down | arachidonate 5-lipoxygenase activating protein             |
| FCN1      | -1.50189 | 1.44E-09 | 2.63E-09 | -6.30864 | Down | ficolin 1                                                  |
| GABRP     | -1.50022 | 4.13E-18 | 1.13E-17 | -9.45081 | Down | gamma-aminobutyric acid type A receptor pi subunit         |
| PSTPIP2   | -1.48225 | 5.17E-15 | 1.21E-14 | -8.38564 | Down | proline-serine-threonine phosphatase interacting protein 2 |
| FCAR      | -1.47755 | 2.65E-10 | 5.02E-10 | -6.61101 | Down | Fc fragment of IgA receptor                                |
| S100P     | -1.4758  | 5.41E-19 | 1.59E-18 | -9.74463 | Down | S100 calcium binding protein P                             |
| LILRA2    | -1.46484 | 2.39E-12 | 4.94E-12 | -7.41189 | Down | leukocyte immunoglobulin like receptor A2                  |
| DEFA6     | -1.4532  | 3.85E-21 | 1.29E-20 | -10.446  | Down | defensin alpha 6                                           |
| SH2D6     | -1.45243 | 8.19E-10 | 1.51E-09 | -6.41037 | Down | SH2 domain containing 6                                    |
| PROK2     | -1.44931 | 2.68E-10 | 5.07E-10 | -6.60902 | Down | prokineticin 2                                             |
| HCK       | -1.43882 | 2.89E-13 | 6.25E-13 | -7.75431 | Down | HCK proto-oncogene, Src family tyrosine kinase             |
| GCG       | -1.42497 | 2.43E-11 | 4.82E-11 | -7.0241  | Down | glucagon                                                   |
| FYB1      | -1.4225  | 2.31E-15 | 5.5E-15  | -8.50909 | Down | FYN binding protein 1                                      |
| VNN2      | -1.41657 | 1.04E-09 | 1.92E-09 | -6.36652 | Down | vanin 2                                                    |
| DCLK2     | -1.40933 | 6.2E-10  | 1.15E-09 | -6.46023 | Down | doublecortin like kinase 2                                 |
| GAPT      | -1.38273 | 1.05E-12 | 2.21E-12 | -7.546   | Down | GRB2 binding adaptor protein, transmembrane                |
| C11orf53  | -1.38203 | 6.37E-16 | 1.56E-15 | -8.70463 | Down | chromosome 11 open reading frame 53                        |
| LRMP      | -1.37944 | 4E-13    | 8.58E-13 | -7.70226 | Down | lymphoid restricted membrane protein                       |
| SRGN      | -1.35639 | 1.3E-13  | 2.85E-13 | -7.88154 | Down | serglycin                                                  |
| LINC01659 | -1.33744 | 2.84E-14 | 6.41E-14 | -8.12165 | Down | long intergenic non-protein coding RNA 1659                |
| SMIM25    | -1.33409 | 2.46E-10 | 4.66E-10 | -6.62428 | Down | small integral membrane protein 25                         |
| IGFBP6    | -1.32576 | 9.92E-11 | 1.91E-10 | -6.78301 | Down | insulin like growth factor binding protein 6               |
| LRRK2     | -1.31787 | 2.32E-08 | 4E-08    | -5.78906 | Down | leucine rich repeat kinase 2                               |
| CHI3L1    | -1.30335 | 3.22E-11 | 6.34E-11 | -6.97635 | Down | chitinase 3 like 1                                         |
| PTGS1     | -1.30256 | 1.29E-09 | 2.37E-09 | -6.32805 | Down | prostaglandin-endoperoxide synthase 1                      |
| GMFG      | -1.29993 | 2.97E-13 | 6.41E-13 | -7.7501  | Down | glia maturation factor gamma                               |
| IFITM2    | -1.29973 | 3.3E-12  | 6.79E-12 | -7.3584  | Down | interferon induced transmembrane protein 2                 |
| SIRPB1    | -1.28055 | 3.73E-10 | 7.01E-10 | -6.5508  | Down | signal regulatory protein beta 1                           |
| ITGB2     | -1.27683 | 1.21E-08 | 2.13E-08 | -5.91262 | Down | integrin subunit beta 2                                    |

|              |          |          |          |          |      |                                                                    |
|--------------|----------|----------|----------|----------|------|--------------------------------------------------------------------|
| LINC02381    | -1.27637 | 4.36E-12 | 8.91E-12 | -7.31258 | Down | long intergenic non-protein coding RNA 2381                        |
| CMTM2        | -1.27416 | 1.25E-08 | 2.19E-08 | -5.9066  | Down | CKLF like MARVEL transmembrane domain containing 2                 |
| TNFRSF10C    | -1.27367 | 3.64E-12 | 7.47E-12 | -7.34244 | Down | TNF receptor superfamily member 10c                                |
| FCER1G       | -1.27239 | 2.88E-12 | 5.94E-12 | -7.38085 | Down | Fc fragment of IgE receptor Ig                                     |
| LOC105371267 | -1.25916 | 4.82E-09 | 8.6E-09  | -6.08622 | Down | p53-regulated lncRNA 1                                             |
| CD300LF      | -1.24447 | 1.3E-10  | 2.49E-10 | -6.73601 | Down | CD300 molecule like family member f                                |
| S1PR4        | -1.24308 | 2.16E-10 | 4.1E-10  | -6.64734 | Down | sphingosine-1-phosphate receptor 4                                 |
| CFD          | -1.23349 | 2.74E-12 | 5.65E-12 | -7.38934 | Down | complement factor D                                                |
| REG3A        | -1.23007 | 8.89E-13 | 1.88E-12 | -7.57321 | Down | regenerating family member 3 alpha                                 |
| P2RY13       | -1.229   | 2.7E-09  | 4.88E-09 | -6.19313 | Down | purinergic receptor P2Y13                                          |
| ADAMTS18     | -1.22052 | 3.48E-12 | 7.15E-12 | -7.34974 | Down | ADAM metalloproteinase with thrombospondin type 1 motif 18         |
| GABRA4       | -1.21806 | 1.23E-10 | 2.36E-10 | -6.74605 | Down | gamma-aminobutyric acid type A receptor alpha4 subunit             |
| DCN          | -1.21612 | 2.8E-08  | 4.82E-08 | -5.75231 | Down | decorin                                                            |
| DEFA5        | -1.21483 | 1.82E-17 | 4.75E-17 | -9.23425 | Down | defensin alpha 5                                                   |
| HLA-DPB2     | -1.21017 | 1.78E-12 | 3.7E-12  | -7.46016 | Down | major histocompatibility complex, class II, DP beta 2 (pseudogene) |
| ITLN2        | -1.20882 | 1.69E-11 | 3.37E-11 | -7.08585 | Down | intelectin 2                                                       |
| MFAP5        | -1.2029  | 2.16E-09 | 3.92E-09 | -6.23427 | Down | microfibril associated protein 5                                   |
| ITPRID1      | -1.20233 | 1.63E-08 | 2.83E-08 | -5.85669 | Down | ITPR interacting domain containing 1                               |
| GNG13        | -1.20122 | 3.05E-09 | 5.5E-09  | -6.17092 | Down | G protein subunit gamma 13                                         |
| HTR3E        | -1.19469 | 3.99E-08 | 6.81E-08 | -5.68372 | Down | 5-hydroxytryptamine receptor 3E                                    |
| PRSS30P      | -1.18774 | 3.74E-11 | 7.33E-11 | -6.95102 | Down | serine protease 30, pseudogene                                     |
| KRT23        | -1.18773 | 1.46E-13 | 3.2E-13  | -7.86308 | Down | keratin 23                                                         |
| GPC3         | -1.18382 | 4.13E-11 | 8.09E-11 | -6.93383 | Down | glypican 3                                                         |
| DPYSL3       | -1.17092 | 3.32E-10 | 6.26E-10 | -6.57126 | Down | dihydropyrimidinase like 3                                         |
| FCGR3A       | -1.16899 | 3.07E-08 | 5.27E-08 | -5.73453 | Down | Fc fragment of IgG receptor IIIa                                   |
| TNFAIP6      | -1.16808 | 4.51E-10 | 8.44E-10 | -6.51716 | Down | TNF alpha induced protein 6                                        |
| IL17RB       | -1.16514 | 6.19E-13 | 1.32E-12 | -7.63188 | Down | interleukin 17 receptor B                                          |
| CSF2RA       | -1.16435 | 4.46E-10 | 8.36E-10 | -6.51891 | Down | colony stimulating factor 2 receptor alpha subunit                 |
| DPEP2        | -1.1561  | 1.51E-10 | 2.88E-10 | -6.71012 | Down | dipeptidase 2                                                      |
| GINS2        | -1.15116 | 6.15E-15 | 1.43E-14 | -8.35883 | Down | GINS complex subunit 2                                             |
| CEACAM4      | -1.14827 | 1.13E-08 | 1.98E-08 | -5.92678 | Down | CEA cell adhesion molecule 4                                       |
| NFE2         | -1.14079 | 1.8E-09  | 3.28E-09 | -6.2679  | Down | nuclear factor, erythroid 2                                        |
| AZGP1        | -1.13437 | 1.66E-18 | 4.69E-18 | -9.58281 | Down | alpha-2-glycoprotein 1, zinc-binding                               |
| NCF2         | -1.13264 | 5.84E-07 | 9.36E-07 | -5.14168 | Down | neutrophil cytosolic factor 2                                      |



|           |          |          |          |          |      |                                                      |
|-----------|----------|----------|----------|----------|------|------------------------------------------------------|
| AVIL      | -1.13039 | 3.15E-11 | 6.2E-11  | -6.98025 | Down | advillin                                             |
| CDA       | -1.1102  | 8.79E-09 | 1.55E-08 | -5.97363 | Down | cytidinedeaminase                                    |
| NTM       | -1.10539 | 3.82E-12 | 7.84E-12 | -7.33425 | Down | neurotrimin                                          |
| ITGAX     | -1.10344 | 2.18E-08 | 3.77E-08 | -5.80056 | Down | integrin subunit alpha X                             |
| LINC01291 | -1.09343 | 1.37E-07 | 2.27E-07 | -5.43966 | Down | long intergenic non-protein coding RNA 1291          |
| TLR2      | -1.09327 | 1.1E-09  | 2.02E-09 | -6.35749 | Down | toll like receptor 2                                 |
| CSTA      | -1.09275 | 7.07E-10 | 1.31E-09 | -6.43677 | Down | cystatin A                                           |
| LILRB3    | -1.08956 | 9.15E-14 | 2.02E-13 | -7.93767 | Down | leukocyte immunoglobulin like receptor B3            |
| AZGP1P1   | -1.08773 | 6.52E-11 | 1.27E-10 | -6.85562 | Down | AZGP1 pseudogene 1                                   |
| ALOX5     | -1.0861  | 2.38E-08 | 4.1E-08  | -5.78412 | Down | arachidonate 5-lipoxygenase                          |
| ADH1B     | -1.08602 | 2.56E-10 | 4.83E-10 | -6.61764 | Down | alcohol dehydrogenase 1B (class I), beta polypeptide |
| GNLY      | -1.08269 | 3.25E-07 | 5.29E-07 | -5.26331 | Down | granulysin                                           |
| CTTNBP2   | -1.07586 | 1.57E-10 | 3E-10    | -6.70314 | Down | cortactin binding protein 2                          |
| G0S2      | -1.07514 | 8.21E-15 | 1.9E-14  | -8.31443 | Down | G0/G1 switch 2                                       |
| PGLYRP1   | -1.07458 | 3.04E-08 | 5.22E-08 | -5.73655 | Down | peptidoglycan recognition protein 1                  |
| S100A4    | -1.07443 | 8.35E-17 | 2.12E-16 | -9.00887 | Down | S100 calcium binding protein A4                      |
| PTAFR     | -1.07318 | 2.41E-08 | 4.16E-08 | -5.78112 | Down | platelet activating factor receptor                  |
| CREG2     | -1.07196 | 1.89E-09 | 3.45E-09 | -6.25845 | Down | cellular repressor of E1A stimulated genes 2         |
| CD14      | -1.07177 | 1.2E-13  | 2.63E-13 | -7.89459 | Down | CD14 molecule                                        |
| NRG2      | -1.06712 | 1.39E-09 | 2.55E-09 | -6.31437 | Down | neuregulin 2                                         |
| SH2D7     | -1.06627 | 2.65E-08 | 4.56E-08 | -5.76324 | Down | SH2 domain containing 7                              |
| POU2F3    | -1.06521 | 3.02E-09 | 5.44E-09 | -6.17285 | Down | POU class 2 homeobox 3                               |
| PSCA      | -1.06453 | 2.77E-06 | 4.29E-06 | -4.80706 | Down | prostate stem cell antigen                           |
| CES1      | -1.05685 | 5.39E-09 | 9.59E-09 | -6.06549 | Down | carboxylesterase 1                                   |
| PRSS2     | -1.05308 | 3.26E-12 | 6.71E-12 | -7.36054 | Down | serine protease 2                                    |
| CAMP      | -1.05177 | 1.07E-09 | 1.98E-09 | -6.36151 | Down | cathelicidin antimicrobial peptide                   |
| NFIX      | -1.04764 | 2.74E-19 | 8.32E-19 | -9.84211 | Down | nuclear factor I X                                   |
| BATF3     | -1.04628 | 5.43E-06 | 8.26E-06 | -4.65722 | Down | basic leucine zipper ATF-like transcription factor 3 |
| EVI2B     | -1.04404 | 2.45E-08 | 4.23E-08 | -5.77816 | Down | ecotropic viral integration site 2B                  |
| SERPING1  | -1.04274 | 6.42E-08 | 1.08E-07 | -5.59034 | Down | serpin family G member 1                             |
| LTF       | -1.03602 | 1.81E-06 | 2.84E-06 | -4.89975 | Down | lactotransferrin                                     |
| B4GALNT4  | -1.02932 | 1.35E-07 | 2.24E-07 | -5.44267 | Down | beta-1,4-N-acetyl-galactosaminyltransferase 4        |
| SEMA7A    | -1.02701 | 2.61E-10 | 4.94E-10 | -6.61374 | Down | semaphorin 7A (John Milton Hagen blood group)        |
| TCF4      | -1.0253  | 2.15E-09 | 3.91E-09 | -6.23481 | Down | transcription factor 4                               |

|           |          |          |          |          |      |                                                           |
|-----------|----------|----------|----------|----------|------|-----------------------------------------------------------|
| SELENOM   | -1.02365 | 6.17E-16 | 1.51E-15 | -8.70949 | Down | selenoprotein M                                           |
| FAT3      | -1.02341 | 5.14E-06 | 7.84E-06 | -4.6695  | Down | FAT atypical cadherin 3                                   |
| NEUROG3   | -1.02085 | 4.9E-06  | 7.47E-06 | -4.6805  | Down | neurogenin 3                                              |
| CHST15    | -1.01907 | 2.67E-08 | 4.6E-08  | -5.76159 | Down | carbohydrate sulfotransferase 15                          |
| SPARCL1   | -1.0183  | 4.56E-07 | 7.36E-07 | -5.19313 | Down | SPARC like 1                                              |
| LOC643802 | -1.01226 | 9.06E-09 | 1.6E-08  | -5.96786 | Down | u3 small nucleolarribonucleoprotein protein MPP10-like    |
| DKK3      | -1.00785 | 8.66E-06 | 1.3E-05  | -4.55109 | Down | dickkopf WNT signaling pathway inhibitor 3                |
| LGALS1    | -1.00235 | 5.84E-12 | 1.19E-11 | -7.26391 | Down | galectin 1                                                |
| FGR       | -0.99994 | 2.53E-07 | 4.13E-07 | -5.31498 | Down | FGR proto-oncogene, Src family tyrosine kinase            |
| KCNN3     | -0.9998  | 6.96E-09 | 1.23E-08 | -6.01762 | Down | potassium calcium-activated channel subfamily N member 3  |
| TIMP1     | -0.9988  | 1.05E-12 | 2.21E-12 | -7.5463  | Down | TIMP metalloproteinase inhibitor 1                        |
| EFEMP1    | -0.99551 | 7.59E-07 | 1.21E-06 | -5.08646 | Down | EGF containing fibulin extracellular matrix protein 1     |
| VNN3      | -0.9936  | 4.97E-07 | 8.01E-07 | -5.17509 | Down | vanin 3                                                   |
| ASPG      | -0.99342 | 1.99E-08 | 3.44E-08 | -5.81849 | Down | asparaginase                                              |
| HTRA3     | -0.99294 | 3.36E-07 | 5.46E-07 | -5.25654 | Down | HtrA serine peptidase 3                                   |
| CLEC4D    | -0.99156 | 1.11E-06 | 1.75E-06 | -5.00596 | Down | C-type lectin domain family 4 member D                    |
| HOXA3     | -0.99129 | 1.15E-07 | 1.92E-07 | -5.47391 | Down | homeobox A3                                               |
| STMN1     | -0.98831 | 6.06E-12 | 1.23E-11 | -7.25784 | Down | stathmin 1                                                |
| SMOC2     | -0.98598 | 1.21E-09 | 2.23E-09 | -6.33934 | Down | SPARC related modular calcium binding 2                   |
| CREB5     | -0.98564 | 2.14E-06 | 3.33E-06 | -4.86383 | Down | cAMP responsive element binding protein 5                 |
| MATK      | -0.97994 | 6.44E-06 | 9.76E-06 | -4.61869 | Down | megakaryocyte-associated tyrosine kinase                  |
| PECAM1    | -0.96693 | 6.44E-09 | 1.14E-08 | -6.032   | Down | platelet and endothelial cell adhesion molecule 1         |
| MT1L      | -0.96498 | 1.39E-09 | 2.55E-09 | -6.31438 | Down | metallothionein 1L, pseudogene                            |
| ISLR      | -0.96392 | 2.2E-06  | 3.43E-06 | -4.85758 | Down | immunoglobulin superfamily containing leucine rich repeat |
| PTHLH     | -0.96272 | 7.58E-09 | 1.34E-08 | -6.00148 | Down | parathyroid hormone like hormone                          |
| SAMSN1    | -0.95931 | 3.32E-09 | 5.97E-09 | -6.15537 | Down | SAM domain, SH3 domain and nuclear localization signals 1 |
| LY96      | -0.95758 | 1.61E-07 | 2.66E-07 | -5.40643 | Down | lymphocyte antigen 96                                     |
| TMEM71    | -0.95733 | 1.12E-06 | 1.77E-06 | -5.00384 | Down | transmembrane protein 71                                  |
| KLK13     | -0.95617 | 3.06E-07 | 4.99E-07 | -5.27549 | Down | kallikrein related peptidase 13                           |
| GABRB1    | -0.95244 | 1.21E-07 | 2.01E-07 | -5.46453 | Down | gamma-aminobutyric acid type A receptor beta1 subunit     |
| LINC00528 | -0.95159 | 1.99E-08 | 3.44E-08 | -5.81858 | Down | long intergenic non-protein coding RNA 528                |
| NMU       | -0.94715 | 2.74E-06 | 4.24E-06 | -4.80965 | Down | neuromedin U                                              |
| ADGRG3    | -0.94291 | 3.75E-06 | 5.75E-06 | -4.74043 | Down | adhesion G protein-coupled receptor G3                    |
| CLEC3B    | -0.94233 | 1.71E-06 | 2.68E-06 | -4.91267 | Down | C-type lectin domain family 3 member B                    |

|              |          |          |          |          |      |                                                          |
|--------------|----------|----------|----------|----------|------|----------------------------------------------------------|
| CHAT         | -0.94185 | 3.12E-07 | 5.09E-07 | -5.27144 | Down | choline O-acetyltransferase                              |
| SFRP2        | -0.94159 | 2.04E-05 | 3E-05    | -4.35094 | Down | secreted frizzled related protein 2                      |
| HOXA-AS3     | -0.94085 | 3.83E-07 | 6.21E-07 | -5.22925 | Down | HOXA cluster antisense RNA 3                             |
| LOC107984660 | -0.93861 | 9.76E-08 | 1.63E-07 | -5.5072  | Down | uncharacterized LOC107984660                             |
| HMX2         | -0.93439 | 4.58E-07 | 7.38E-07 | -5.19255 | Down | H6 family homeobox 2                                     |
| RARRES2      | -0.93382 | 5.29E-08 | 8.96E-08 | -5.62856 | Down | retinoic acid receptor responder 2                       |
| FGF2         | -0.93132 | 3.91E-07 | 6.32E-07 | -5.22542 | Down | fibroblast growth factor 2                               |
| NRCAM        | -0.92949 | 1.67E-08 | 2.91E-08 | -5.85163 | Down | neuronal cell adhesion molecule                          |
| IGSF6        | -0.92697 | 1.85E-07 | 3.05E-07 | -5.37856 | Down | immunoglobulin superfamily member 6                      |
| RUNX2        | -0.92564 | 6.06E-09 | 1.08E-08 | -6.04335 | Down | RUNX family transcription factor 2                       |
| CSF2RB       | -0.92127 | 0.000165 | 0.00023  | -3.83075 | Down | colony stimulating factor 2 receptor beta common subunit |
| RBP1         | -0.92063 | 2.69E-09 | 4.86E-09 | -6.19406 | Down | retinol binding protein 1                                |
| GJC3         | -0.91737 | 9.73E-09 | 1.71E-08 | -5.95447 | Down | gap junction protein gamma 3                             |
| LAMA1        | -0.91673 | 3.18E-11 | 6.27E-11 | -6.97839 | Down | laminin subunit alpha 1                                  |
| CA9          | -0.91529 | 4.17E-08 | 7.11E-08 | -5.6751  | Down | carbonic anhydrase 9                                     |
| C5AR1        | -0.91295 | 8.09E-13 | 1.71E-12 | -7.58852 | Down | complement C5a receptor 1                                |
| SUCNR1       | -0.91247 | 6.15E-07 | 9.86E-07 | -5.13067 | Down | succinate receptor 1                                     |
| PILRA        | -0.91107 | 2.01E-09 | 3.66E-09 | -6.24739 | Down | paired immunoglobulin like type 2 receptor alpha         |
| ZNF280B      | -0.90704 | 1.11E-07 | 1.84E-07 | -5.48235 | Down | zinc finger protein 280B                                 |
| ALOX12B      | -0.90342 | 1.18E-06 | 1.86E-06 | -4.99292 | Down | arachidonate 12-lipoxygenase, 12R type                   |
| VIM          | -0.90338 | 2.07E-12 | 4.29E-12 | -7.43545 | Down | vimentin                                                 |
| GCA          | -0.90123 | 4.11E-20 | 1.31E-19 | -10.1124 | Down | grancalcin                                               |
| ARSL         | -0.9002  | 8.12E-10 | 1.5E-09  | -6.41182 | Down | arylsulfatase L                                          |
| NPY1R        | -0.89988 | 7.22E-06 | 1.09E-05 | -4.59281 | Down | neuropeptide Y receptor Y1                               |
| PYY          | -0.89785 | 6.46E-08 | 1.09E-07 | -5.58913 | Down | peptide YY                                               |
| LUM          | -0.8963  | 5.27E-06 | 8.03E-06 | -4.66398 | Down | lumican                                                  |
| PRDX4        | -0.89295 | 5.53E-20 | 1.76E-19 | -10.0702 | Down | peroxiredoxin 4                                          |
| GMPR         | -0.89255 | 8.31E-08 | 1.4E-07  | -5.53915 | Down | guanosine monophosphate reductase                        |
| LINC00619    | -0.88955 | 1.2E-05  | 1.79E-05 | -4.47604 | Down | long intergenic non-protein coding RNA 619               |
| DIPK1C       | -0.88949 | 2.42E-07 | 3.96E-07 | -5.32405 | Down | divergent protein kinase domain 1C                       |
| HOTAIRM1     | -0.88797 | 2.75E-06 | 4.25E-06 | -4.80915 | Down | HOXA transcript antisense RNA, myeloid-specific 1        |
| SLA          | -0.88514 | 5.2E-09  | 9.27E-09 | -6.07188 | Down | Src like adaptor                                         |
| QPCT         | -0.87983 | 5.14E-08 | 8.73E-08 | -5.63392 | Down | glutaminyI-peptide cyclotransferase                      |
| FZD9         | -0.87833 | 3.69E-07 | 5.98E-07 | -5.23716 | Down | frizzled class receptor 9                                |

|           |          |          |          |          |      |                                             |
|-----------|----------|----------|----------|----------|------|---------------------------------------------|
| IRAK3     | -0.87753 | 4.71E-06 | 7.19E-06 | -4.68917 | Down | interleukin 1 receptor associated kinase 3  |
| H2AC20    | -0.87742 | 8.13E-12 | 1.64E-11 | -7.20881 | Down | H2A clustered histone 20                    |
| LINC01558 | -0.87093 | 4.65E-09 | 8.31E-09 | -6.09273 | Down | long intergenic non-protein coding RNA 1558 |
| CLEC7A    | -0.86899 | 8.29E-07 | 1.32E-06 | -5.06784 | Down | C-type lectin domain containing 7A          |
| ARL3      | -0.86846 | 1.15E-15 | 2.78E-15 | -8.61519 | Down | ADP ribosylation factor like GTPase 3       |
| CPB1      | -0.86599 | 7.73E-07 | 1.23E-06 | -5.0825  | Down | carboxypeptidase B1                         |
| NHP2      | -0.86537 | 1.09E-17 | 2.89E-17 | -9.30881 | Down | NHP2 ribonucleoprotein                      |
| MGP       | -0.86469 | 1.44E-06 | 2.27E-06 | -4.94923 | Down | matrix Gla protein                          |
| TFPI2     | -0.8646  | 2.93E-06 | 4.53E-06 | -4.79498 | Down | tissue factor pathway inhibitor 2           |
| PTCHD1    | -0.86302 | 2.89E-06 | 4.46E-06 | -4.79821 | Down | patched domain containing 1                 |
| BEX3      | -0.86286 | 3.25E-10 | 6.12E-10 | -6.57508 | Down | brain expressed X-linked 3                  |
| KLRB1     | -0.86277 | 2.05E-09 | 3.72E-09 | -6.24405 | Down | killer cell lectin like receptor B1         |
| TM4SF1    | -0.86268 | 9.88E-06 | 1.48E-05 | -4.52074 | Down | transmembrane 4 L six family member 1       |
| CENPH     | -0.86213 | 3.92E-09 | 7.02E-09 | -6.12471 | Down | centromere protein H                        |
| CMSS1     | -0.86072 | 1.55E-07 | 2.57E-07 | -5.41408 | Down | cms1 ribosomal small subunit homolog        |
| PDZK1IP1  | -0.86008 | 3.05E-08 | 5.23E-08 | -5.73612 | Down | PDZK1 interacting protein 1                 |
| C12orf77  | -0.86002 | 7.8E-08  | 1.31E-07 | -5.55183 | Down | chromosome 12 open reading frame 77         |
| ARHGDIB   | -0.85952 | 2.39E-11 | 4.74E-11 | -7.02687 | Down | Rho GDP dissociation inhibitor beta         |
| REG1A     | -0.8595  | 1.03E-08 | 1.81E-08 | -5.94381 | Down | regenerating family member 1 alpha          |
| PLG       | -0.85344 | 2.14E-05 | 3.15E-05 | -4.3394  | Down | plasminogen                                 |
| CLEC12A   | -0.85252 | 5.81E-07 | 9.32E-07 | -5.14264 | Down | C-type lectin domain family 12 member A     |
| BEX2      | -0.85122 | 3.86E-10 | 7.24E-10 | -6.54475 | Down | brain expressed X-linked 2                  |
| AIF1      | -0.8511  | 2.26E-09 | 4.1E-09  | -6.226   | Down | allograft inflammatory factor 1             |
| GHRL      | -0.85036 | 2.26E-05 | 3.31E-05 | -4.32708 | Down | ghrelin and obestatinprepropeptide          |
| LOC441179 | -0.84744 | 1.18E-09 | 2.17E-09 | -6.34459 | Down | uncharacterized LOC441179                   |
| SDC2      | -0.84714 | 4.83E-08 | 8.21E-08 | -5.64625 | Down | syndecan 2                                  |
| NCAM1     | -0.84173 | 1.82E-05 | 2.69E-05 | -4.37793 | Down | neural cell adhesion molecule 1             |
| SPI1      | -0.83977 | 5.69E-06 | 8.64E-06 | -4.6468  | Down | Spi-1 proto-oncogene                        |
| TPH1      | -0.83699 | 0.000243 | 0.000335 | -3.72775 | Down | tryptophan hydroxylase 1                    |
| ANXA1     | -0.83667 | 8.09E-14 | 1.79E-13 | -7.957   | Down | annexin A1                                  |
| MFAP4     | -0.83639 | 4.44E-05 | 6.41E-05 | -4.16334 | Down | microfibril associated protein 4            |
| DUT       | -0.8362  | 1.84E-14 | 4.18E-14 | -8.18954 | Down | deoxyuridinetriphosphatase                  |
| ARG1      | -0.83307 | 3.63E-05 | 5.27E-05 | -4.21241 | Down | arginase 1                                  |
| UBE2C     | -0.83225 | 1.09E-06 | 1.73E-06 | -5.00957 | Down | ubiquitin conjugating enzyme E2 C           |

|             |          |          |          |          |      |                                                           |
|-------------|----------|----------|----------|----------|------|-----------------------------------------------------------|
| ITGAM       | -0.83087 | 1.15E-05 | 1.71E-05 | -4.48649 | Down | integrin subunit alpha M                                  |
| KIT         | -0.83048 | 2.36E-07 | 3.86E-07 | -5.32937 | Down | KIT proto-oncogene, receptor tyrosine kinase              |
| SLCO4A1-AS1 | -0.82969 | 3.2E-09  | 5.76E-09 | -6.16193 | Down | SLCO4A1 antisense RNA 1                                   |
| PDCD2L      | -0.82766 | 1.54E-08 | 2.68E-08 | -5.86725 | Down | programmed cell death 2 like                              |
| FAM241B     | -0.82755 | 2.42E-07 | 3.96E-07 | -5.32407 | Down | family with sequence similarity 241 member B              |
| KRT7        | -0.82044 | 4.06E-06 | 6.22E-06 | -4.72248 | Down | keratin 7                                                 |
| GGH         | -0.81874 | 3.66E-06 | 5.63E-06 | -4.74544 | Down | gamma-glutamyl hydrolase                                  |
| SNORD3B-2   | -0.81629 | 1.38E-05 | 2.05E-05 | -4.44308 | Down | small nucleolar RNA, C/D box 3B-2                         |
| RAD51AP1    | -0.8148  | 1.54E-06 | 2.42E-06 | -4.93524 | Down | RAD51 associated protein 1                                |
| LINC02532   | -0.81209 | 5.53E-07 | 8.88E-07 | -5.15301 | Down | long intergenic non-protein coding RNA 2532               |
| SLC11A1     | -0.80888 | 3.84E-07 | 6.22E-07 | -5.2289  | Down | solute carrier family 11 member 1                         |
| FEV         | -0.80795 | 1.36E-05 | 2.02E-05 | -4.44715 | Down | FEV transcription factor, ETS family member               |
| CFP         | -0.8049  | 9.56E-08 | 1.6E-07  | -5.51138 | Down | complement factor properdin                               |
| SLC29A1     | -0.80386 | 2.28E-06 | 3.54E-06 | -4.85039 | Down | solute carrier family 29 member 1 (Augustine blood group) |
| TAGLN3      | -0.80338 | 5.86E-07 | 9.4E-07  | -5.14074 | Down | transgelin 3                                              |
| LCN2        | -0.80216 | 0.000336 | 0.000459 | -3.6407  | Down | lipocalin 2                                               |
| C1R         | -0.80124 | 1.88E-05 | 2.77E-05 | -4.37086 | Down | complement C1r                                            |
| PTPRO       | -0.80091 | 6.18E-05 | 8.84E-05 | -4.08146 | Down | protein tyrosine phosphatase receptor type O              |
| RNF24       | -0.79982 | 1.93E-15 | 4.61E-15 | -8.5366  | Down | ring finger protein 24                                    |
| CORO2B      | -0.79959 | 2.93E-07 | 4.78E-07 | -5.28462 | Down | coronin 2B                                                |
| C1S         | -0.7981  | 9.25E-05 | 0.000131 | -3.97997 | Down | complement C1s                                            |
| NCCRP1      | -0.7954  | 0.026208 | 0.031211 | -2.23762 | Down | NCCRP1, F-box associated domain containing                |
| HMMR        | -0.79432 | 2.04E-05 | 3E-05    | -4.35137 | Down | hyaluronan mediated motility receptor                     |
| RP9P        | -0.79422 | 8.85E-11 | 1.71E-10 | -6.80288 | Down | RP9 pseudogene                                            |
| PHACTR1     | -0.79365 | 6.24E-09 | 1.11E-08 | -6.03813 | Down | phosphatase and actin regulator 1                         |
| PDCL3       | -0.79108 | 3.1E-12  | 6.39E-12 | -7.36861 | Down | phosducin like 3                                          |
| ALMS1P1     | -0.79072 | 4.31E-07 | 6.96E-07 | -5.20495 | Down | ALMS1 pseudogene 1                                        |
| EXOSC5      | -0.78977 | 1.1E-09  | 2.02E-09 | -6.35782 | Down | exosome component 5                                       |
| ADA2        | -0.78854 | 7.31E-09 | 1.29E-08 | -6.00841 | Down | adenosine deaminase 2                                     |
| DNAJC12     | -0.78582 | 1.7E-06  | 2.66E-06 | -4.91426 | Down | DnaJ heat shock protein family (Hsp40) member C12         |
| CDH26       | -0.7857  | 4.47E-06 | 6.83E-06 | -4.70098 | Down | cadherin 26                                               |
| CD200       | -0.78548 | 6.73E-08 | 1.14E-07 | -5.58097 | Down | CD200 molecule                                            |
| PTTG1       | -0.78455 | 6.16E-06 | 9.34E-06 | -4.62865 | Down | PTTG1 regulator of sister chromatid separation, securin   |
| LAGE3       | -0.78419 | 3.22E-14 | 7.25E-14 | -8.10186 | Down | L antigen family member 3                                 |

|              |          |          |          |          |      |                                                                     |
|--------------|----------|----------|----------|----------|------|---------------------------------------------------------------------|
| DTD1         | -0.78413 | 5.25E-12 | 1.07E-11 | -7.28146 | Down | D-aminoacyl-tRNAdeacylase 1                                         |
| LYRM4        | -0.78175 | 2.31E-09 | 4.18E-09 | -6.22224 | Down | LYR motif containing 4                                              |
| GPX2         | -0.78018 | 4.93E-09 | 8.8E-09  | -6.0819  | Down | glutathione peroxidase 2                                            |
| FRMD6-AS1    | -0.77992 | 4.81E-08 | 8.18E-08 | -5.64699 | Down | FRMD6 antisense RNA 1                                               |
| CAV1         | -0.77952 | 2.29E-06 | 3.55E-06 | -4.84952 | Down | caveolin 1                                                          |
| LILRB2       | -0.77863 | 7.21E-06 | 1.09E-05 | -4.59301 | Down | leukocyte immunoglobulin like receptor B2                           |
| GSTA1        | -0.7765  | 4.09E-16 | 1.01E-15 | -8.77117 | Down | glutathione S-transferase alpha 1                                   |
| EPHB1        | -0.77644 | 1.05E-06 | 1.67E-06 | -5.01725 | Down | EPH receptor B1                                                     |
| TCEA2        | -0.77589 | 2.63E-09 | 4.75E-09 | -6.19856 | Down | transcription elongation factor A2                                  |
| LGALS2       | -0.7738  | 1.07E-13 | 2.35E-13 | -7.91275 | Down | galectin 2                                                          |
| MIR3142HG    | -0.77228 | 1.32E-06 | 2.08E-06 | -4.96814 | Down | MIR3142 host gene                                                   |
| SNRNP27      | -0.77092 | 5.05E-26 | 6.72E-24 | -11.9879 | Down | small nuclear ribonucleoprotein U4/U6.U5 subunit 27                 |
| APOBEC4      | -0.77033 | 1.16E-07 | 1.93E-07 | -5.47291 | Down | apolipoprotein B mRNA editing enzyme catalytic polypeptide like 4   |
| GRK5         | -0.76969 | 6.8E-12  | 1.38E-11 | -7.23845 | Down | G protein-coupled receptor kinase 5                                 |
| NHSL2        | -0.7677  | 6.68E-07 | 1.07E-06 | -5.11349 | Down | NHS like 2                                                          |
| BIRC5        | -0.76553 | 0.00011  | 0.000155 | -3.9349  | Down | baculoviral IAP repeat containing 5                                 |
| ST8SIA6      | -0.76454 | 9.63E-07 | 1.53E-06 | -5.03593 | Down | ST8 alpha-N-acetyl-neuraminide alpha-2,8-sialyltransferase 6        |
| SLPI         | -0.76269 | 5.64E-06 | 8.57E-06 | -4.64884 | Down | secretory leukocyte peptidase inhibitor                             |
| CPA3         | -0.76184 | 5.82E-06 | 8.83E-06 | -4.6417  | Down | carboxypeptidase A3                                                 |
| APIP         | -0.75836 | 8.49E-14 | 1.88E-13 | -7.94941 | Down | APAF1 interacting protein                                           |
| GAU1         | -0.75708 | 1.62E-06 | 2.53E-06 | -4.92472 | Down | GALNT8 antisense upstream 1                                         |
| ASRGL1       | -0.75703 | 1.75E-07 | 2.88E-07 | -5.39035 | Down | asparaginase and isoaspartyl peptidase 1                            |
| ARL9         | -0.75687 | 5.33E-06 | 8.11E-06 | -4.66162 | Down | ADP ribosylation factor like GTPase 9                               |
| REG1B        | -0.75584 | 0.004298 | 0.005437 | -2.88419 | Down | regenerating family member 1 beta                                   |
| HTR3C        | -0.75545 | 0.000857 | 0.00114  | -3.37826 | Down | 5-hydroxytryptamine receptor 3C                                     |
| PAFAH1B3     | -0.7553  | 4.55E-13 | 9.74E-13 | -7.68151 | Down | platelet activating factor acetylhydrolase 1b catalytic subunit 3   |
| OLFML2B      | -0.75517 | 1.67E-05 | 2.47E-05 | -4.39799 | Down | olfactomedin like 2B                                                |
| FFAR2        | -0.75491 | 1.87E-09 | 3.4E-09  | -6.2608  | Down | free fatty acid receptor 2                                          |
| SLC18A1      | -0.75399 | 7.26E-05 | 0.000103 | -4.0412  | Down | solute carrier family 18 member A1                                  |
| LOC101929653 | -0.75121 | 8.43E-06 | 1.27E-05 | -4.55726 | Down | uncharacterized LOC101929653                                        |
| ZRSR2        | -0.74774 | 1.83E-22 | 6.72E-22 | -10.8699 | Down | zinc finger CCCH-type, RNA binding motif and serine/arginine rich 2 |
| AJUBA        | -0.74485 | 2.08E-05 | 3.06E-05 | -4.34609 | Down | ajuba LIM protein                                                   |
| TEX11        | -0.74096 | 1.07E-06 | 1.69E-06 | -5.01405 | Down | testis expressed 11                                                 |
| LRMDA        | -0.73822 | 3.27E-07 | 5.32E-07 | -5.26189 | Down | leucine rich melanocyte differentiation associated                  |

|              |          |          |          |          |      |                                                                        |
|--------------|----------|----------|----------|----------|------|------------------------------------------------------------------------|
| MAP1B        | -0.73787 | 2.14E-05 | 3.14E-05 | -4.33984 | Down | microtubule associated protein 1B                                      |
| IQCM         | -0.73734 | 8.98E-05 | 0.000127 | -3.98753 | Down | IQ motif containing M                                                  |
| TPD52L1      | -0.73672 | 2.35E-09 | 4.25E-09 | -6.21925 | Down | TPD52 like 1                                                           |
| LOC105373383 | -0.73665 | 1.35E-07 | 2.24E-07 | -5.44249 | Down | uncharacterized LOC105373383                                           |
| NPL          | -0.73414 | 1.07E-05 | 1.6E-05  | -4.50171 | Down | N-acetylneuraminate pyruvate lyase                                     |
| PLEKHB1      | -0.73395 | 8.44E-06 | 1.27E-05 | -4.55711 | Down | pleckstrin homology domain containing B1                               |
| PRRG3        | -0.73243 | 1.04E-17 | 2.77E-17 | -9.31547 | Down | proline rich and Gla domain 3                                          |
| ALPL         | -0.72885 | 0.000942 | 0.001249 | -3.35088 | Down | alkaline phosphatase, biomineralization associated                     |
| GADD45GIP1   | -0.72882 | 6.47E-23 | 2.49E-22 | -11.0133 | Down | GADD45G interacting protein 1                                          |
| PBK          | -0.7274  | 6.62E-05 | 9.45E-05 | -4.06438 | Down | PDZ binding kinase                                                     |
| LRRC25       | -0.72682 | 3.82E-05 | 5.53E-05 | -4.20028 | Down | leucine rich repeat containing 25                                      |
| RANBP1       | -0.72626 | 3.42E-18 | 9.38E-18 | -9.47813 | Down | RAN binding protein 1                                                  |
| NOB1         | -0.72543 | 2.76E-11 | 5.45E-11 | -7.00288 | Down | NIN1 (RPN12) binding protein 1 homolog                                 |
| PCED1B-AS1   | -0.72517 | 6E-06    | 9.1E-06  | -4.63466 | Down | PCED1B antisense RNA 1                                                 |
| PIK3CG       | -0.72497 | 8.86E-06 | 1.33E-05 | -4.54601 | Down | phosphatidylinositol-4,5-bisphosphate 3-kinase catalytic subunit gamma |
| RNU4-1       | -0.72444 | 8.02E-07 | 1.28E-06 | -5.07475 | Down | RNA, U4 small nuclear 1                                                |
| REG4         | -0.72421 | 8.83E-05 | 0.000125 | -3.99174 | Down | regenerating family member 4                                           |
| MARC1        | -0.72322 | 1.24E-10 | 2.39E-10 | -6.74388 | Down | mitochondrial amidoxime reducing component 1                           |
| IFI16        | -0.72321 | 2.16E-10 | 4.09E-10 | -6.64745 | Down | interferon gamma inducible protein 16                                  |
| ACOT12       | -0.72317 | 4.85E-05 | 6.99E-05 | -4.14148 | Down | acyl-CoA thioesterase 12                                               |
| ICAM3        | -0.72272 | 3.25E-05 | 4.72E-05 | -4.23988 | Down | intercellular adhesion molecule 3                                      |
| CD52         | -0.71988 | 4.87E-07 | 7.84E-07 | -5.17959 | Down | CD52 molecule                                                          |
| SPTSSB       | -0.71979 | 1.66E-05 | 2.46E-05 | -4.39959 | Down | serine palmitoyltransferase small subunit B                            |
| PRIM1        | -0.71899 | 1.91E-09 | 3.47E-09 | -6.25716 | Down | DNA primase subunit 1                                                  |
| C19orf38     | -0.71898 | 4.09E-07 | 6.62E-07 | -5.21561 | Down | chromosome 19 open reading frame 38                                    |
| SIRPB2       | -0.71858 | 9.81E-05 | 0.000139 | -3.96503 | Down | signal regulatory protein beta 2                                       |
| SYCE1L       | -0.71442 | 1.15E-06 | 1.82E-06 | -4.99775 | Down | synaptonemal complex central element protein 1 like                    |
| PNPLA4       | -0.7134  | 6.64E-21 | 2.2E-20  | -10.3694 | Down | patatin like phospholipase domain containing 4                         |
| RPS4X        | -0.71308 | 5.06E-21 | 1.69E-20 | -10.4076 | Down | ribosomal protein S4 X-linked                                          |
| PART1        | -0.71107 | 3.41E-05 | 4.95E-05 | -4.22787 | Down | prostate androgen-regulated transcript 1                               |
| PRKCQ-AS1    | -0.71024 | 5.64E-08 | 9.55E-08 | -5.61593 | Down | PRKCQ antisense RNA 1                                                  |
| TANC2        | -0.70923 | 8.4E-06  | 1.26E-05 | -4.55818 | Down | tetratricopeptide repeat, ankyrin repeat and coiled-coil containing 2  |
| CCL25        | -0.70859 | 1.36E-13 | 2.98E-13 | -7.87433 | Down | C-C motif chemokine ligand 25                                          |
| LYAR         | -0.70856 | 1.44E-10 | 2.75E-10 | -6.71829 | Down | Ly1 antibody reactive                                                  |

|              |          |          |          |          |      |                                                  |
|--------------|----------|----------|----------|----------|------|--------------------------------------------------|
| MAD2L1       | -0.70846 | 1.1E-05  | 1.65E-05 | -4.49566 | Down | mitotic arrest deficient 2 like 1                |
| OSM          | -0.70532 | 0.003017 | 0.003857 | -2.99805 | Down | oncostatin M                                     |
| STAMBPL1     | -0.70522 | 2.01E-12 | 4.17E-12 | -7.44036 | Down | STAM binding protein like 1                      |
| IGFBP3       | -0.70516 | 0.000374 | 0.000509 | -3.61146 | Down | insulin like growth factor binding protein 3     |
| PLEK         | -0.70442 | 0.000495 | 0.000669 | -3.53384 | Down | pleckstrin                                       |
| VRK1         | -0.70275 | 1.43E-09 | 2.61E-09 | -6.30981 | Down | VRK serine/threonine kinase 1                    |
| GCAT         | -0.70242 | 1.17E-09 | 2.14E-09 | -6.34659 | Down | glycine C-acetyltransferase                      |
| ITLN1        | -0.7002  | 0.002379 | 0.003066 | -3.07254 | Down | intelectin 1                                     |
| EWSAT1       | -0.69692 | 1.17E-05 | 1.75E-05 | -4.48121 | Down | Ewing sarcoma associated transcript 1            |
| LOC105376731 | -0.69547 | 3.39E-05 | 4.93E-05 | -4.22896 | Down | taste receptor cell protein 1-like               |
| RRM2         | -0.69529 | 0.000413 | 0.000561 | -3.58419 | Down | ribonucleotidereductase regulatory subunit M2    |
| CYSLTR1      | -0.69287 | 4.79E-07 | 7.72E-07 | -5.18288 | Down | cysteinyl leukotriene receptor 1                 |
| ASCL2        | -0.69276 | 2.01E-06 | 3.13E-06 | -4.8779  | Down | achaete-scute family bHLH transcription factor 2 |
| IGFBP7       | -0.69267 | 0.000117 | 0.000165 | -3.91992 | Down | insulin like growth factor binding protein 7     |
| CNTLN        | -0.69228 | 1.83E-07 | 3.01E-07 | -5.38083 | Down | centlein                                         |
| TFB2M        | -0.69091 | 1.13E-12 | 2.38E-12 | -7.53386 | Down | transcription factor B2, mitochondrial           |
| LOC105370969 | -0.69005 | 3.83E-11 | 7.5E-11  | -6.94703 | Down | uncharacterized LOC105370969                     |
| BRCA2        | -0.68944 | 4.98E-08 | 8.46E-08 | -5.64023 | Down | BRCA2 DNA repair associated                      |
| CCNB2        | -0.68935 | 2.72E-06 | 4.21E-06 | -4.8111  | Down | cyclin B2                                        |
| SMYD3        | -0.68823 | 1.65E-09 | 3.01E-09 | -6.28373 | Down | SET and MYND domain containing 3                 |
| DEPDC1B      | -0.688   | 3.44E-06 | 5.3E-06  | -4.75938 | Down | DEP domain containing 1B                         |
| PRNP         | -0.68762 | 2.2E-10  | 4.17E-10 | -6.64401 | Down | prion protein                                    |
| HMGB2        | -0.68732 | 1.19E-14 | 2.72E-14 | -8.25735 | Down | high mobility group box 2                        |
| HSBP1L1      | -0.68695 | 2.61E-17 | 6.8E-17  | -9.18061 | Down | heat shock factor binding protein 1 like 1       |
| TFB1M        | -0.68692 | 6.77E-17 | 1.73E-16 | -9.03989 | Down | transcription factor B1, mitochondrial           |
| CLEC2B       | -0.68681 | 2.42E-07 | 3.97E-07 | -5.32366 | Down | C-type lectin domain family 2 member B           |
| CCDC112      | -0.68659 | 6.03E-17 | 1.54E-16 | -9.0571  | Down | coiled-coil domain containing 112                |
| MT1H         | -0.68643 | 1.35E-06 | 2.12E-06 | -4.96442 | Down | metallothionein 1H                               |
| NDUFA4L2     | -0.68599 | 8.91E-05 | 0.000126 | -3.98953 | Down | NDUFA4 mitochondrial complex associated like 2   |
| GIMAP4       | -0.68586 | 1.79E-05 | 2.65E-05 | -4.3816  | Down | GTPase, IMAP family member 4                     |
| TUBG2        | -0.68581 | 7.88E-09 | 1.39E-08 | -5.99417 | Down | tubulin gamma 2                                  |
| DUSP14       | -0.68577 | 3.81E-06 | 5.85E-06 | -4.73661 | Down | dual specificity phosphatase 14                  |
| TCEA3        | -0.68406 | 1.8E-13  | 3.91E-13 | -7.83056 | Down | transcription elongation factor A3               |
| ITGB3BP      | -0.68356 | 7.85E-07 | 1.25E-06 | -5.07942 | Down | integrin subunit beta 3 binding protein          |



|           |          |          |          |          |      |                                                                    |
|-----------|----------|----------|----------|----------|------|--------------------------------------------------------------------|
| CCNB1     | -0.68321 | 4.6E-05  | 6.63E-05 | -4.15469 | Down | cyclin B1                                                          |
| SERP2     | -0.68282 | 2.07E-06 | 3.22E-06 | -4.87111 | Down | stress associated endoplasmic reticulum protein family member 2    |
| FBXO16    | -0.68242 | 2.85E-06 | 4.41E-06 | -4.8008  | Down | F-box protein 16                                                   |
| UBE2T     | -0.68202 | 8.25E-05 | 0.000117 | -4.00896 | Down | ubiquitin conjugating enzyme E2 T                                  |
| TEX45     | -0.6818  | 2.38E-05 | 3.49E-05 | -4.31442 | Down | testis expressed 45                                                |
| GSTA2     | -0.68156 | 3.31E-14 | 7.44E-14 | -8.09767 | Down | glutathione S-transferase alpha 2                                  |
| TUBA1A    | -0.68135 | 1.42E-07 | 2.36E-07 | -5.4316  | Down | tubulin alpha 1a                                                   |
| TFF3      | -0.6801  | 3.45E-07 | 5.6E-07  | -5.25105 | Down | trefoil factor 3                                                   |
| LYSMD2    | -0.67844 | 1.01E-07 | 1.69E-07 | -5.50035 | Down | LysM domain containing 2                                           |
| CCDC115   | -0.67679 | 1.13E-18 | 3.24E-18 | -9.63795 | Down | coiled-coil domain containing 115                                  |
| TRAPPC6A  | -0.67667 | 1.45E-14 | 3.33E-14 | -8.22584 | Down | trafficking protein particle complex 6A                            |
| COL27A1   | -0.67665 | 0.001993 | 0.002581 | -3.12729 | Down | collagen type XXVII alpha 1 chain                                  |
| MYEOV     | -0.67635 | 9.68E-07 | 1.54E-06 | -5.03481 | Down | myeloma overexpressed                                              |
| NBPF25P   | -0.67608 | 2.7E-06  | 4.18E-06 | -4.81272 | Down | NBPF member 25, pseudogene                                         |
| MTSS1     | -0.6758  | 2.42E-06 | 3.75E-06 | -4.83725 | Down | MTSS I-BAR domain containing 1                                     |
| HMG5      | -0.67369 | 1.09E-15 | 2.65E-15 | -8.62274 | Down | high mobility group nucleosome binding domain 5                    |
| MACROH2A2 | -0.67298 | 3.02E-08 | 5.19E-08 | -5.73755 | Down | macroH2A.2 histone                                                 |
| EFCAB2    | -0.67142 | 9.42E-05 | 0.000133 | -3.97547 | Down | EF-hand calcium binding domain 2                                   |
| MRPL24    | -0.67047 | 6.04E-16 | 1.48E-15 | -8.71251 | Down | mitochondrial ribosomal protein L24                                |
| B3GNTL1   | -0.67007 | 1.95E-06 | 3.05E-06 | -4.88373 | Down | UDP-GlcNAc:betaGal beta-1,3-N-acetylglucosaminyltransferase like 1 |
| SVBP      | -0.66935 | 8E-13    | 1.69E-12 | -7.59039 | Down | small vasohibin binding protein                                    |
| ZG16B     | -0.66934 | 0.000136 | 0.000191 | -3.88055 | Down | zymogen granule protein 16B                                        |
| NUF2      | -0.66866 | 0.001596 | 0.002082 | -3.19479 | Down | NUF2 component of NDC80 kinetochore complex                        |
| TGM3      | -0.66848 | 0.0019   | 0.002466 | -3.1419  | Down | transglutaminase 3                                                 |
| GAL       | -0.66812 | 0.00051  | 0.000689 | -3.52545 | Down | galanin and GMAP prepropeptide                                     |
| LINC01091 | -0.66782 | 1.2E-06  | 1.89E-06 | -4.98943 | Down | long intergenic non-protein coding RNA 1091                        |
| IL27RA    | -0.66616 | 8.49E-08 | 1.42E-07 | -5.53502 | Down | interleukin 27 receptor subunit alpha                              |
| NDUFA8    | -0.66391 | 3.02E-21 | 1.02E-20 | -10.48   | Down | NADH:ubiquinoneoxidoreductase subunit A8                           |
| CXCR4     | -0.66333 | 0.000196 | 0.000271 | -3.78588 | Down | C-X-C motif chemokine receptor 4                                   |
| EFCAB11   | -0.66283 | 4.8E-08  | 8.16E-08 | -5.6475  | Down | EF-hand calcium binding domain 11                                  |
| MRPL11    | -0.66144 | 3.76E-11 | 7.37E-11 | -6.95006 | Down | mitochondrial ribosomal protein L11                                |
| CNN2      | -0.66051 | 5.86E-10 | 1.09E-09 | -6.47039 | Down | calponin 2                                                         |
| PADI2     | -0.65931 | 0.000937 | 0.001242 | -3.35254 | Down | peptidyl arginine deiminase 2                                      |
| RBP7      | -0.65875 | 3.39E-05 | 4.92E-05 | -4.22951 | Down | retinol binding protein 7                                          |

|              |          |          |          |          |      |                                                                        |
|--------------|----------|----------|----------|----------|------|------------------------------------------------------------------------|
| TRHDE        | -0.65869 | 6.31E-08 | 1.07E-07 | -5.59382 | Down | thyrotropin releasing hormone degrading enzyme                         |
| DYRK4        | -0.65852 | 8.58E-08 | 1.44E-07 | -5.53279 | Down | dual specificity tyrosine phosphorylation regulated kinase 4           |
| RSL1D1       | -0.65767 | 1.49E-17 | 3.93E-17 | -9.26281 | Down | ribosomal L1 domain containing 1                                       |
| PMS1         | -0.65748 | 7.63E-12 | 1.54E-11 | -7.21926 | Down | PMS1 homolog 1, mismatch repair system component                       |
| SPINK2       | -0.65624 | 0.000695 | 0.00093  | -3.43859 | Down | serine peptidase inhibitor, Kazal type 2                               |
| MLN          | -0.65434 | 0.001154 | 0.001521 | -3.29155 | Down | motilin                                                                |
| HSPA4L       | -0.65258 | 6.56E-08 | 1.11E-07 | -5.58593 | Down | heat shock protein family A (Hsp70) member 4 like                      |
| NINJ2        | -0.65086 | 1.13E-06 | 1.79E-06 | -5.00106 | Down | ninjurin 2                                                             |
| NIFK         | -0.65067 | 4.13E-11 | 8.08E-11 | -6.93404 | Down | nucleolar protein interacting with the FHA domain of MKI67             |
| PAK3         | -0.64986 | 0.000118 | 0.000165 | -3.91861 | Down | p21 (RAC1) activated kinase 3                                          |
| CLEC17A      | -0.64974 | 0.000166 | 0.000231 | -3.8287  | Down | C-type lectin domain containing 17A                                    |
| HAP1         | -0.64918 | 0.000302 | 0.000413 | -3.67006 | Down | huntingtin associated protein 1                                        |
| LOC100240735 | -0.64912 | 2.28E-05 | 3.35E-05 | -4.32462 | Down | uncharacterized LOC100240735                                           |
| EBPL         | -0.64865 | 1.94E-08 | 3.36E-08 | -5.82299 | Down | EBP like                                                               |
| TMEFF2       | -0.64863 | 0.001038 | 0.001372 | -3.32271 | Down | transmembrane protein with EGF like and two follistatin like domains 2 |
| C3AR1        | -0.64742 | 3.7E-05  | 5.36E-05 | -4.20806 | Down | complement C3a receptor 1                                              |
| CHSY1        | -0.64724 | 1.29E-08 | 2.26E-08 | -5.90066 | Down | chondroitin sulfate synthase 1                                         |
| CCDC122      | -0.64674 | 3.06E-11 | 6.03E-11 | -6.98523 | Down | coiled-coil domain containing 122                                      |
| CASC1        | -0.64425 | 4.01E-05 | 5.8E-05  | -4.18834 | Down | cancer susceptibility 1                                                |
| CRYBA2       | -0.6431  | 0.000169 | 0.000235 | -3.82502 | Down | crystallin beta A2                                                     |
| FBL          | -0.64216 | 3.85E-10 | 7.23E-10 | -6.54519 | Down | fibrillarin                                                            |
| PTPN14       | -0.64175 | 1.86E-05 | 2.74E-05 | -4.3735  | Down | protein tyrosine phosphatase non-receptor type 14                      |
| YPEL1        | -0.64165 | 5.73E-06 | 8.7E-06  | -4.64534 | Down | yippee like 1                                                          |
| MRPL12       | -0.6412  | 1.27E-07 | 2.1E-07  | -5.45525 | Down | mitochondrial ribosomal protein L12                                    |
| PFDN2        | -0.64085 | 7.38E-20 | 2.34E-19 | -10.0292 | Down | prefoldin subunit 2                                                    |
| SELPLG       | -0.64013 | 3.31E-05 | 4.81E-05 | -4.23543 | Down | selectin P ligand                                                      |

**Table S2.** The enriched GO terms of the up and down regulated differentially expressed genes.

| GO ID              | CATEGORY | GO Name                                              | P Value  | FDR B&H  | FDR B&Y  | Bonferroni | Gene Count | Gene                                                                                                                                                                                                                                                                                                                                                                        |
|--------------------|----------|------------------------------------------------------|----------|----------|----------|------------|------------|-----------------------------------------------------------------------------------------------------------------------------------------------------------------------------------------------------------------------------------------------------------------------------------------------------------------------------------------------------------------------------|
| Up regulated genes |          |                                                      |          |          |          |            |            |                                                                                                                                                                                                                                                                                                                                                                             |
| GO:0120036         | BP       | plasma membrane bounded cell projection organization | 3.96E-13 | 1.02E-09 | 9.35E-09 | 2.05E-09   | 85         | DLG5,ERBB2,CDC42EP4,ACHE,TRPM2,PDZD7,GPRIN1,PLXNB2,ADCY6,CH RNB2,AMIGO1,TAOK2,FZD1,DACT1,TUBB3,IGSF9,FGFR3,PLCG1,PLD2,VA V2,PLXNA2,PLXNB1,RASAL1,ACAP3,ARAP1,SEMA6C,PLXNA3,FLNA,VLD LR,EPS8L2,MINK1,CAMSAP3,SHC1,DOCK10,DNAH1,AATK,NSMF,ZNF335,P LXNA4,PPP1R16B,STK36,ZSWIM8,MYH9,TBC1D9B,MYO7A,CDHR2,INPPL1, SPTBN1,SARM1,RAP1GAP2,PLPPR5,ITGA3,CUL7,PRAG1,DCTN1,ITGB4,PLE |

|                             |    |                            |          |          |          |          |    |                                                                                                                                                                                                                                                                                                                                                                                                                                                                                                                                                                                                                                                                                                                                                                                                                                                                                                                                                |
|-----------------------------|----|----------------------------|----------|----------|----------|----------|----|------------------------------------------------------------------------------------------------------------------------------------------------------------------------------------------------------------------------------------------------------------------------------------------------------------------------------------------------------------------------------------------------------------------------------------------------------------------------------------------------------------------------------------------------------------------------------------------------------------------------------------------------------------------------------------------------------------------------------------------------------------------------------------------------------------------------------------------------------------------------------------------------------------------------------------------------|
| GO:0022008                  | BP | neurogenesis               | 3.83E-12 | 4.96E-09 | 4.53E-08 | 1.98E-08 | 85 | KHM1,MAPK8IP3,PTK7,NTNG2,ARHGEF7,WDR90,NOTCH1,RAB35,RAP1GA<br>P,HDAC6,RAPGEF4,SMURF1,LAMA5,LAMB2,LAMC1,PIP5K1C,CIT,LIF,SEM<br>A3D,LINGO1,DAW1,LRP4,ROBO1,SCRIB,AGRN,EPHA10,DMTN,EVI5L,SEZ6<br>DLG5,ERBB2,ACHE,PDZD7,GPRIN1,PLXNB2,ADCY6,CHRNA2,AMIGO1,TA<br>OK2,FZD1,DACT1,TUBB3,GRK2,SUN2,JAG1,DISP3,IGSF9,FGFR3,PLCG1,PL<br>D2,PLXNA2,PLXNB1,RASAL1,ACAP3,SEMA6C,PLXNA3,FLNA,VLDLR,MIN<br>K1,WNT9B,CAMSA3,SHC1,DOCK10,NRBP2,AATK,NSMF,ZNF335,PLXNA4,<br>DCHS1,GABRR2,ZSWIM8,MYO7A,INPPL1,SPTBN1,SARM1,RAP1GAP2,PLPP<br>R5,ITGA3,CUL7,PRAG1,ITGB4,MAPK8IP3,PTK7,IGSF10,NTNG2,ARHGEF7,M<br>YRF,DAGLA,MED12,NOTCH1,NOTCH3,CDON,PCSK9,RAB35,TCF3,RAP1GA<br>P,HDAC6,HDAC5,RAPGEF4,SMURF1,LAMB2,LAMC1,PIP5K1C,CIT,LDLR,LI<br>F,SEMA3D,LINGO1,LRP4,ROBO1,SCRIB,AGRN,EPHA10,SEZ6                                                                                                                                                                     |
| GO:0043005                  | CC | neuron<br>projection       | 3.36E-08 | 3.89E-06 | 2.75E-05 | 2.18E-05 | 67 | ACHE,TRPM2,PDZD7,GPRIN1,CHRM4,CHRNA2,ADCY6,CHRNA2,AMIGO1,T<br>AOK2,FZD1,TUBB3,GRK2,IGSF9,PLCG1,ACAP3,UNC13B,MAPK8IP1,FLNA,E<br>PS8L2,ANK1,POLG,MINK1,DOCK10,TRIM3,AATK,NSMF,CTNND1,GABRR2,<br>MYO1D,MYO7A,SPTBN1,SARM1,CPLX2,SREBF2,RAP1GAP2,RNF40,ITGA3,<br>DCTN1,TIAM2,MAPK8IP3,ITPR3,NTNG2,ARHGEF7,SV2B,KCNK2,CACNA1H<br>,BSN,DMWD,DAGLA,CACNA1C,RAP1GAP,CAD,HDAC6,RAPGEF4,NUMA1,<br>SMURF1,CASR,SYT7,OPRK1,LRP4,ROBO1,CCDC120,ELK1,AGRN,EPHA10,S<br>EZ6                                                                                                                                                                                                                                                                                                                                                                                                                                                                                    |
| GO:0005794                  | CC | Golgi<br>apparatus         | 2.58E-07 | 1.52E-05 | 1.07E-04 | 1.67E-04 | 65 | LZTR1,MAN2A2,ACHE,WDR81,ZDHHC8,ABCA7,ADCY3,FASN,AP1B1,CLTC<br>,CHPF2,FGFR3,PLD2,MARCHF4,ARAP1,COL1A1,UNC13B,HSPG2,FLNA,NDS<br>T1,INPP5E,MINK1,MYO18A,CPD,PPP6R1,TRIM3,PITPNM1,SEC24C,TRPM4,C<br>LSTN3,GBF1,INPPL1,SREBF1,SREBF2,FYCO1,CUL7,SLC30A1,CCDC88B,MA<br>PK8IP3,DENND4B,TMEM132A,SEC16A,KIFC3,B4GALNT3,BSN,MYRF,BAIA<br>P3,POFUT2,NOTCH1,NOTCH3,PCSK9,NPC1,RAB35,ZDHHC11B,RAP1GAP,H<br>DAC5,NUMA1,GRINA,ATP9A,CIT,LDLR,ATP8B2,MALRD1,ZDHHC11,AGRN<br>CDK18,ERBB2,ABCA2,ACHE,PFKFB3,ABCA7,CHRM4,ADCY3,CHRNA2,AD<br>CY6,CHRNA2,TAOK2,TYK2,FASN,GRK2,CLCN7,CHIT,PI4KA,MAP3K10,FG<br>FR3,CARNS1,OPLAH,CDC42BPG,HYOU1,MINK1,MYO18A,DGKD,SKIV2L,Z<br>AP70,DNAH1,NLRP6,MST1R,NRBP2,AATK,DDX3Y,MAPK4,SNRNP200,PRK<br>Y,TRPM4,STK36,MYH9,MYO1D,MYO7A,MYO7B,DGKQ,CUL9,SIK1,TOR4A,I<br>P6K1,MAST2,PRAG1,PTK7,ITPKB,ITPR3,PASK,ATP13A3,KIFC3,NOS2,NLRC<br>3,DNHD1,CAD,RPS6KA4,GPT,MAP3K14,OAS3,UPF1,ATP9A,PIP5K1C,CIT,AT<br>P8B2,KIFC2,AGRN,EPHA10 |
| GO:0008144                  | MF | drug binding               | 1.57E-07 | 4.53E-05 | 3.38E-04 | 1.54E-04 | 73 | CDK18,ERBB2,ABCA2,ACHE,PFKFB3,ABCA7,ADCY3,ADCY6,TAOK2,TYK<br>2,TUBB3,GRK2,CLCN7,CHIT,PI4KA,MAP3K10,FGFR3,CARNS1,OPLAH,CDC<br>42BPG,HYOU1,MINK1,MYO18A,DGKD,IRGQ,SKIV2L,ZAP70,DNAH1,NLRP6<br>,MST1R,NRBP2,AATK,DDX3Y,MAPK4,SNRNP200,PRKY,TRPM4,STK36,MY<br>H9,NDOR1,MYO1D,MYO7A,MYO7B,DGKQ,CUL9,SIK1,TOR4A,IP6K1,MAST<br>2,PRAG1,PTK7,ITPKB,PASK,GVINP1,ARHGEF7,IFI44L,ATP13A3,KIFC3,NOS<br>2,NLRC3,DNHD1,RAB35,RAP1GAP,CAD,RPS6KA4,MAP3K14,RAPGEF4,OAS<br>3,UPF1,ATP9A,PIP5K1C,CIT,ATP8B2,KIFC2,EPHA10                                                                                                                                                                                                                                                                                                                                                                                                                                         |
| GO:0032553                  | MF | ribonucleotid<br>e binding | 1.05E-06 | 1.28E-04 | 9.53E-04 | 1.02E-03 | 75 | CDK18,ERBB2,ABCA2,PDE4A,PFKFB3,ABCA7,ADCY3,ADCY6,TAOK2,TYK<br>2,TUBB3,GRK2,CLCN7,CHIT,PI4KA,MAP3K10,FGFR3,CARNS1,OPLAH,CDC<br>42BPG,HYOU1,MINK1,MYO18A,DGKD,IRGQ,SKIV2L,ZAP70,DNAH1,NLRP6<br>,MST1R,NRBP2,AATK,DDX3Y,MAPK4,SNRNP200,PRKY,TRPM4,STK36,MY<br>H9,NDOR1,MYO1D,MYO7A,MYO7B,DGKQ,CUL9,SIK1,TOR4A,IP6K1,MAST<br>2,PRAG1,PTK7,ITPKB,PASK,GVINP1,ARHGEF7,IFI44L,ATP13A3,KIFC3,NOS<br>2,NLRC3,DNHD1,RAB35,RAP1GAP,CAD,RPS6KA4,MAP3K14,RAPGEF4,OAS<br>3,UPF1,ATP9A,PIP5K1C,CIT,ATP8B2,KIFC2,EPHA10                                                                                                                                                                                                                                                                                                                                                                                                                                        |
| <b>Down regulated genes</b> |    |                            |          |          |          |          |    |                                                                                                                                                                                                                                                                                                                                                                                                                                                                                                                                                                                                                                                                                                                                                                                                                                                                                                                                                |
| GO:0001775                  | BP | cell<br>activation         | 1.50E-24 | 5.78E-22 | 5.30E-21 | 8.09E-21 | 95 | CDH26,LILRB2,PECAM1,LRRK2,CLEC7A,CFP,SIRPB1,CHI3L1,FZD9,S100A8,<br>S100A9,TYROBP,S100A12,S100P,FCAR,FCER1G,FCGR2A,FCGR3A,FCGR3B,<br>FCN1,PIK3CG,QPCT,AIF1,GCA,BATF3,FGR,PLEK,MMP9,MNDA,ALOX5,CN<br>N2,CD200,IL27RA,SELL,SELPLG,ADGRG3,CD300LF,ANXA1,FPR1,PRDX4,FP<br>R2,GMFG,SUCNR1,ARG1,SLC11A1,CLEC4D,SLPI,FYB1,PRNP,CXC18,CXCR<br>1,CXCR2,PRSS2,RIPOR2,SPI1,GAPT,PTAFR,SAMSN1,ITGAM,ITGAX,ADA2,I<br>TGB2,CLEC12A,GGH,CFD,CLEC4E,CXCR4,ADGRE3,ADAMTS18,PYGL,C3A<br>R1,C5AR1,KIT,SPINK5,LST1,TCF4,LILRB3,LILRA2,PGLYRP1,CAMP,CAV1,R<br>UNX2,LCN2,LGALS1,GAL,CD14,TIMP1,TLR2,IRAG2,PAK3,CDA,LTF,TNFAI<br>P6,PAI2,EPHB1                                                                                                                                                                                                                                                                                                                         |

|            |    |                               |          |          |          |          |     |                                                                                                                                                                                                                                                                                                                                                                                                                                                                                                                                                                                                                   |
|------------|----|-------------------------------|----------|----------|----------|----------|-----|-------------------------------------------------------------------------------------------------------------------------------------------------------------------------------------------------------------------------------------------------------------------------------------------------------------------------------------------------------------------------------------------------------------------------------------------------------------------------------------------------------------------------------------------------------------------------------------------------------------------|
| GO:0046903 | BP | secretion                     | 8.35E-23 | 2.25E-20 | 2.06E-19 | 4.49E-19 | 101 | LILRB2,PECAM1,LRRK2,CHAT,CFP,SIRPB1,CHI3L1,S100A8,S100A9,TYROBP,S100A12,S100P,FCAR,FCER1G,FCGR2A,FCGR3B,FCN1,PIK3CG,SVBP,QPCT,AIF1,PLA2G2A,GCA,FGR,PLG,PLEK,MMP9,MNDA,ALOX5,CNN2,ALOX12B,IL17RB,CD200,IL27RA,SELL,ADGRG3,ANXA1,FPR1,PRDX4,FPR2,SELENO M,GMFG,BIRC5,SUCNR1,AQP9,ARG1,SLC11A1,IGFBP3,CLEC4D,SLC18A1,SRGN,SLPI,CXCR1,CXCR2,PRSS2,GHRL,NCAM1,GCG,ISLR,PTAFR,ITGAM,ITGAX,ADA2,ITGB2,PTGS1,CLEC12A,NMU,GGH,CFD,CLEC4E,IL1R2,ADGRE3,SERPING1,PYGL,C3AR1,C5AR1,KIT,CA9,LILRB3,LILRA2,NPY1R,RARRES2,PGLYRP1,HAP1,FFAR2,CAMP,CAV1,LCN2,GAL,OSM,CD14,TIMP1,TLR2,IRAG2,TREM1,CDA,CLEC3B,LTf,TNFAIP6,PADI2,HCK |
| GO:0030141 | CC | secretory granule             | 1.09E-33 | 5.89E-31 | 4.05E-30 | 5.89E-31 | 82  | LILRB2,PECAM1,CFP,SIRPB1,CHI3L1,S100A8,S100A9,TYROBP,S100A12,S100P,FCAR,FCER1G,FCGR2A,FCGR3B,FCN1,QPCT,PLA2G2A,GCA,FGR,PLG,MMP9,MNDA,ALOX5,CNN2,SELL,ADGRG3,FPR1,PRDX4,FPR2,GMFG,CPA3,ARG1,SLC11A1,IGFBP3,CLEC4D,SRGN,SLPI,GNAT3,KLK13,CXCR1,CXCR2,PRSS2,GHRL,SPINK2,NCF2,GCG,ISLR,PTAFR,ITGAM,ITGAX,ADA2,ITGB2,CLEC12A,GGH,DEFA5,CFD,BRCA2,ADGRE3,SERPING1,PYGL,C3AR1,C5AR1,KIT,SPINK5,LILRB3,RARRES2,PGLYRP1,CAMP,REG1A,CAV1,LCN2,TFF3,GAL,CD14,TIMP1,TLR2,IRAG2,CDA,CLEC3B,LTf,TNFAIP6,PADI2                                                                                                                   |
| GO:0099503 | CC | secretory vesicle             | 3.83E-32 | 1.04E-29 | 7.14E-29 | 2.08E-29 | 88  | CTTNBP2,LILRB2,PECAM1,LRRK2,CFP,SIRPB1,CHI3L1,S100A8,S100A9,TYROBP,S100A12,S100P,FCAR,FCER1G,FCGR2A,FCGR3B,FCN1,QPCT,PLA2G2A,GCA,FGR,PLG,MMP9,MNDA,ALOX5,CNN2,SELL,ADGRG3,FPR1,PRDX4,FPR2,GMFG,CPA3,ARG1,SLC11A1,IGFBP3,CLEC4D,SLC18A1,SRGN,SLPI,GNAT3,KLK13,CXCR1,CXCR2,PRSS2,GHRL,SPINK2,NCF2,GCG,ISLR,PTAFR,ITGAM,ITGAX,ADA2,ITGB2,CLEC12A,GGH,DEFA5,CFD,BRCA2,ADGRE3,SERPING1,PYGL,C3AR1,C5AR1,KIT,SPINK5,DPYSL3,LILRB3,NPY1R,RARRES2,PGLYRP1,HAP1,CAMP,REG1A,CAV1,LCN2,TFF3,GAL,CD14,TIMP1,TLR2,IRAG2,CDA,CLEC3B,LTf,TNFAIP6,PADI2                                                                           |
| GO:0005102 | MF | signaling receptor binding    | 7.35E-08 | 2.28E-05 | 1.69E-04 | 6.85E-05 | 70  | CDH26,LILRB2,CLEC7A,HMGB2,LY96,HXA3,S100A4,S100A8,S100A9,TYROBP,S100A12,S100P,EFEMP1,FCN1,PIK3CG,PDCL3,FGF2,MLN,FGR,PLG,MM P9,CCL25,PROK2,SELPLG,SFRP2,CD300LF,SEMA7A,PILRA,ANXA1,FPR1,FPR2,ICAM3,GMFG,NRG2,BEX3,IGFBP6,CLEC4D,GNAT3,FYB1,DKK3,PRNP,CXCL8,GABRB1,GHRL,MTSS1,LAMA1,PYY,GCG,ITGAX,ADA2,ITGB2,PTHLH,NMU,PTPN14,RARRES2,PGLYRP1,HAP1,CMTM2,DUT,PSCA,REG1A,CAV1,ITPRID1,CCNB1,GAL,OSM,TIMP1,TLR2,PADI2,HCK                                                                                                                                                                                             |
| GO:0060089 | MF | molecular transducer activity | 1.74E-05 | 1.62E-03 | 1.20E-02 | 1.62E-02 | 63  | IGSF6,REG4,LILRB2,CLEC7A,LY96,FZD9,OR51E1,EFEMP1,FCER1G,FCGR3A,FCN1,IL17RB,IL27RA,ADGRG3,FPR1,FPR2,NRG2,SUCNR1,CSF2RA,CSF2RB,CSF3R,DKK3,PRNP,CXCR1,S1PR4,CXCR2,GABRA4,GABRB1,GABRP,CYSLTR1,HTR3E,P2RY13,HTR3C,TNFRSF10C,PTAFR,ITGAX,ITGB2,CLEC4E,PTPRO,IL1R2,CXCR4,ADGRE3,C3AR1,C5AR1,KIT,KLRB1,LILRB3,LILRA2,NPY1R,PGLYRP1,FFAR2,DUT,PSCA,REG1A,REG1B,CCNB1,GAL,CD14,CCNB2,TLR2,TREM1,REG3A,EPHB1                                                                                                                                                                                                                |

**Table S3.** The enriched pathway terms of the up and down regulated differentially expressed genes.

| Pathway ID         | Pathway Name                      | P-value  | FDR B&H  | FDR B&Y  | Bonferroni | Gene Count | Gene                                                                                                                                                             |
|--------------------|-----------------------------------|----------|----------|----------|------------|------------|------------------------------------------------------------------------------------------------------------------------------------------------------------------|
| Up regulated genes |                                   |          |          |          |            |            |                                                                                                                                                                  |
| 1270303            | Axon guidance                     | 9.77E-04 | 1.16E-01 | 8.42E-01 | 7.99E-01   | 25         | ERBB2,KL,CLTC,FGFR3,PLCG1,VAV2,PLXNA2,PLXNB1,RASAL1,PLXNA3,ANK1,SHC1,PLXNA4,MYH9,SPTBN1,ARHGEF7,CACNA1H,CACNA1C,RAP1GAP,RP S6KA4,LAMC1,PIP5K1C,ROBO1,AGRN,EPHA10 |
| 1270244            | Extracellular matrix organization | 3.71E-03 | 1.56E-01 | 1.00E+00 | 1.00E+00   | 15         | PLEC,COL1A1,HSPG2,COL17A1,ADAMTS14,CAPN15,ITGA3,ITGB4,LAMA5,LAMB2,LAMC1,COL18A1,LRP4,AGRN                                                                        |

|                       |                                       |          |          |          |          |    |                                                                                                                                                                                                                                                                                                                                                                                                                                                                                             |
|-----------------------|---------------------------------------|----------|----------|----------|----------|----|---------------------------------------------------------------------------------------------------------------------------------------------------------------------------------------------------------------------------------------------------------------------------------------------------------------------------------------------------------------------------------------------------------------------------------------------------------------------------------------------|
| 1269443               | Signalling by NGF                     | 3.81E-03 | 1.56E-01 | 1.00E+00 | 1.00E+00 | 21 | PIK3AP1,ERBB2,ADCY3,ADCY6,KL,GRK2,CLTC,FGFR3,PLCG1,VAV2,RASAL1,SHC1,SPTBN1,TIAM2,ITPR3,ARHGEF7,RALGDS,ARHGEF18,PIP5K1C,LINGO1,ELK1                                                                                                                                                                                                                                                                                                                                                          |
| 1270302               | Developmental Biology                 | 1.47E-02 | 3.01E-01 | 1.00E+00 | 1.00E+00 | 36 | ERBB2,EVPL,KL,CLTC,FGFR3,PLCG1,VAV2,PLXNA2,PLXNB1,RASAL1,PLXNA3,ANK1,SHC1,PPL,ZNF335,PLXNA4,MYH9,SPTBN1,SREBF1,SREBF2,ARHGEF7,CACNA1H,MED12,NOTCH1,CDON,CACNA1C,TCF3,RAP1GAP,RPS6KA4,LAMC1,PIP5K1C,PKP3,ROBO1,AGRN,EPAS1,EPHA10                                                                                                                                                                                                                                                             |
| 1269171               | Adaptive Immune System                | 3.98E-02 | 3.97E-01 | 1.00E+00 | 1.00E+00 | 27 | PIK3AP1,ERBB2,FZR1,KL,APIB1,CLTC,FBXO41,FGFR3,PLCG1,TRAF7,SHC1,ZAP70,PPL,RNF123,SEC24C,RAP1GAP2,CUL7,DCTN1,NCR3LG1,ITPR3,KLHL21,RAP1GAP,MAP3K14,RAPGEF4,SMURF1,PIP5K1C,KLHL25                                                                                                                                                                                                                                                                                                               |
| 1270001               | Metabolism of lipids and lipoproteins | 8.50E-02 | 4.43E-01 | 1.00E+00 | 1.00E+00 | 25 | ACHE,ZDHHC8,FASN,LMF2,PI4KA,CLTC,OSBPL7,PLA2G4F,PLD2,VLDLR,INPP5E,PITPNM1,SEC24C,INPPL1,SREBF1,SREBF2,TIAM2,PNPLA6,ARNT2,MED12,PCSK9,NPC1,PIP5K1C,LDLR,AKR1B15                                                                                                                                                                                                                                                                                                                              |
| <b>Down Regulated</b> |                                       |          |          |          |          |    |                                                                                                                                                                                                                                                                                                                                                                                                                                                                                             |
| 1457780               | Neutrophil degranulation              | 3.42E-24 | 2.61E-21 | 1.88E-20 | 2.61E-21 | 58 | LILRB2,PECAM1,CFP,SIRPB1,CHI3L1,S100A8,S100A9,TYROBP,S100A12,S100P,FCAR,FCER1G,FCGR2A,FCGR3B,FCN1,QPCT,GCA,FGR,MMP9,MNDA,ALOX5,CNN2,SELL,ADGRG3,FPR1,PRDX4,FPR2,GMFG,ARG1,SLC11A1,CLEC4D,SLPI,CXCR1,CXCR2,PRSS2,PTAFR,ITGAM,ITGAX,ADA2,ITGB2,CLEC12A,GGH,CFD,ADGRE3,PYGL,C3AR1,C5AR1,LILRB3,PGLYRP1,CAMP,LCN2,CD14,TLR2,IRAG2,CDA,LTF,TNFAIP6,PADI2                                                                                                                                         |
| 1269203               | Innate Immune System                  | 1.09E-16 | 4.15E-14 | 2.99E-13 | 8.30E-14 | 83 | LILRB2,PECAM1,CLEC7A,CFP,SIRPB1,LY96,CHI3L1,S100A8,S100A9,TYROBP,S100A12,S100P,FCAR,FCER1G,FCGR2A,FCGR3B,FCN1,QPCT,FGF2,PLA2G2A,GCA,FGR,MMP9,MNDA,ALOX5,CNN2,SELL,ADGRG3,ITLN1,FPR1,PRDX4,FPR2,ICAM3,GMFG,NRG2,GNLY,IFI16,ARG1,SLC11A1,CSF2RA,CSF2RB,CLEC4D,SLPI,CXCR1,CXCR2,PRSS2,NCAM1,NCF2,PTAFR,ITGAM,ITGAX,ADA2,ITGB2,CLEC12A,GGH,DEFA5,DEFA6,CFD,CLEC4E,ADGRE3,C1R,PYGL,C1S,C3AR1,C5AR1,KIT,LILRB3,PGLYRP1,CAMP,LCN2,CD14,TLR2,IRAG2,TREM1,PAK3,REG3A,IRAK3,CDA,LTF,TNFAIP6,PADI2,HCK |
| 1269576               | G alpha (i) signalling events         | 5.42E-07 | 1.03E-04 | 7.45E-04 | 4.13E-04 | 21 | CCL25,ANXA1,FPR1,FPR2,SUCNR1,GNAT3,CXCL8,CXCR1,S1PR4,CXCR2,GNG13,PYY,P2RY13,NMU,CXCR4,C3AR1,C5AR1,NPY1R,RGS13,GAL,RGS18                                                                                                                                                                                                                                                                                                                                                                     |
| 1269544               | GPCR ligand binding                   | 6.89E-06 | 5.84E-04 | 4.21E-03 | 5.25E-03 | 28 | FZD9,MLN,CCL25,PROK2,ANXA1,FPR1,FPR2,SUCNR1,CXCL8,CXCR1,S1PR4,CXCR2,GHRL,CYSLTR1,GNG13,PYY,P2RY13,GCG,PTAFR,PTHLH,NMU,CXCR4,ADGRE3,C3AR1,C5AR1,NPY1R,FFAR2,GAL                                                                                                                                                                                                                                                                                                                              |
| 1270244               | Extracellular matrix organization     | 4.44E-05 | 2.82E-03 | 2.04E-02 | 3.39E-02 | 20 | PECAM1,MFAP4,EFEMP1,FGF2,PLG,MMP9,SDC2,COL27A1,ICAM3,PRSS2,LAMA1,NCAM1,DCN,ITGAM,ITGAX,ITGB2,ADAMTS18,MFAP5,TIMP1,LUM                                                                                                                                                                                                                                                                                                                                                                       |
| 1269318               | Signaling by Interleukins             | 6.04E-04 | 3.54E-02 | 2.55E-01 | 4.60E-01 | 26 | FGF2,MMP9,ALOX5,IL17RB,IL27RA,VIM,ANXA1,FPR1,NRG2,BIRC5,CSF2RA,CSF2RB,CSF3R,CXCL8,NCAM1,PTAFR,ITGAM,ITGAX,ITGB2,IL1R2,KIT,LCN2,OSM,TIMP1,IRAK3,HCK                                                                                                                                                                                                                                                                                                                                          |

Biological Process(BP), Cellular Component(CC) and Molecular Functions (MF)

**Table S4.** Topology table for up and down regulated genes.

| Regulation | Node   | Degree | Betweenness | Stress   | Closeness |
|------------|--------|--------|-------------|----------|-----------|
| Up         | MYH9   | 231    | 0.083106    | 11909200 | 0.348923  |
| Up         | FLNA   | 196    | 0.07999     | 10927852 | 0.35285   |
| Up         | DCTN1  | 168    | 0.080808    | 7748054  | 0.330668  |
| Up         | CLTC   | 158    | 0.071579    | 7687192  | 0.351161  |
| Up         | ERBB2  | 158    | 0.069347    | 7857692  | 0.327216  |
| Up         | NOTCH1 | 156    | 0.079494    | 9958146  | 0.326941  |
| Up         | MYO18A | 130    | 0.014844    | 2676542  | 0.316892  |
| Up         | PML    | 126    | 0.056341    | 7891820  | 0.329407  |
| Up         | HDAC6  | 117    | 0.054915    | 5893316  | 0.336828  |

|    |          |     |          |         |          |
|----|----------|-----|----------|---------|----------|
| Up | SEC16A   | 111 | 0.041283 | 4516670 | 0.333734 |
| Up | KIFC3    | 110 | 0.044258 | 5676608 | 0.304433 |
| Up | PLCG1    | 94  | 0.037489 | 3302572 | 0.322599 |
| Up | SHC1     | 89  | 0.033089 | 3994096 | 0.330415 |
| Up | TNS2     | 78  | 0.028831 | 3193368 | 0.287479 |
| Up | UPF1     | 75  | 0.029592 | 4141234 | 0.307346 |
| Up | FOXJ2    | 72  | 0.025448 | 4281228 | 0.269837 |
| Up | TMEM63B  | 69  | 0.024305 | 2243442 | 0.28183  |
| Up | CNOT1    | 61  | 0.023067 | 2619024 | 0.302632 |
| Up | FZR1     | 61  | 0.020887 | 2279814 | 0.288932 |
| Up | MED12    | 58  | 0.019843 | 3279514 | 0.268161 |
| Up | SNRNP200 | 57  | 0.01318  | 2905516 | 0.29604  |
| Up | USP20    | 55  | 0.018518 | 1919176 | 0.285851 |
| Up | SMURF1   | 52  | 0.016676 | 2642582 | 0.284034 |
| Up | PRPF8    | 49  | 0.011924 | 1673988 | 0.29983  |
| Up | TYK2     | 44  | 0.011401 | 1809828 | 0.284491 |
| Up | USP19    | 43  | 0.013204 | 1406194 | 0.282527 |
| Up | SPTBN1   | 43  | 0.008444 | 1263038 | 0.311883 |
| Up | SREBF2   | 41  | 0.010766 | 1784174 | 0.284595 |
| Up | HDAC5    | 41  | 0.009427 | 1773292 | 0.280124 |
| Up | CDK18    | 40  | 0.011774 | 1620634 | 0.291751 |
| Up | TCF3     | 39  | 0.008725 | 1051044 | 0.273386 |
| Up | PPP6R1   | 37  | 0.011599 | 836102  | 0.281565 |
| Up | DMWD     | 36  | 0.0128   | 977744  | 0.288396 |
| Up | TUBB3    | 36  | 0.009917 | 915362  | 0.297285 |
| Up | TMEM132A | 36  | 0.012522 | 1682324 | 0.267093 |
| Up | CTNND1   | 35  | 0.009078 | 2098898 | 0.288975 |
| Up | SCRIB    | 35  | 0.008757 | 1548182 | 0.293248 |
| Up | NUMA1    | 34  | 0.008577 | 1678390 | 0.287266 |
| Up | PLEC     | 33  | 0.011149 | 1518000 | 0.316557 |
| Up | FGFR3    | 31  | 0.009978 | 1219886 | 0.270419 |
| Up | NUP205   | 31  | 0.0068   | 1678252 | 0.280832 |
| Up | SREBF1   | 30  | 0.006751 | 1233780 | 0.264926 |
| Up | FASN     | 29  | 0.005503 | 1528992 | 0.285012 |
| Up | ARHGEF7  | 29  | 0.007283 | 803468  | 0.300294 |
| Up | MAPKBP1  | 28  | 0.006804 | 792976  | 0.272275 |
| Up | GCN1     | 28  | 0.006355 | 1152120 | 0.281524 |
| Up | MAP3K14  | 28  | 0.006365 | 1324702 | 0.272581 |
| Up | EPAS1    | 28  | 0.006954 | 1100636 | 0.269444 |
| Up | FYCO1    | 27  | 0.006095 | 824362  | 0.266598 |
| Up | RNF40    | 27  | 0.007483 | 659526  | 0.275752 |
| Up | ADAM15   | 27  | 0.005219 | 828418  | 0.280387 |
| Up | ITGB4    | 27  | 0.006611 | 705452  | 0.293536 |
| Up | FOSL2    | 26  | 0.007185 | 777256  | 0.266562 |
| Up | ZAP70    | 26  | 0.005213 | 501414  | 0.285746 |
| Up | MPRIIP   | 26  | 0.001993 | 320704  | 0.298564 |
| Up | GRK2     | 26  | 0.007851 | 709210  | 0.282691 |
| Up | MYBBP1A  | 26  | 0.005321 | 1182570 | 0.289966 |
| Up | PPL      | 24  | 0.007829 | 695410  | 0.283598 |
| Up | AP1B1    | 23  | 0.004664 | 1193012 | 0.282239 |
| Up | AATK     | 23  | 0.007433 | 1092768 | 0.257315 |
| Up | PPP1R16B | 23  | 0.005479 | 1076064 | 0.26007  |
| Up | CAD      | 22  | 0.003373 | 376692  | 0.290747 |
| Up | PLXNA3   | 22  | 0.005321 | 624980  | 0.248402 |
| Up | HYOU1    | 22  | 0.007487 | 741310  | 0.27802  |

|    |          |    |          |         |          |
|----|----------|----|----------|---------|----------|
| Up | INPPL1   | 21 | 0.003854 | 505262  | 0.282075 |
| Up | MAPK8IP1 | 21 | 0.005349 | 555498  | 0.280893 |
| Up | DLG5     | 21 | 0.00362  | 516518  | 0.258685 |
| Up | RAB35    | 20 | 0.005577 | 721214  | 0.273675 |
| Up | PTK7     | 19 | 0.00563  | 1103892 | 0.245717 |
| Up | DOCK2    | 19 | 0.002529 | 415176  | 0.264422 |
| Up | ELK1     | 18 | 0.002785 | 560550  | 0.270099 |
| Up | EDC4     | 18 | 0.003062 | 367576  | 0.290834 |
| Up | SETD7    | 18 | 0.004202 | 685686  | 0.268421 |
| Up | ATXN2L   | 18 | 0.0033   | 637198  | 0.266562 |
| Up | ANKFY1   | 18 | 0.005338 | 524976  | 0.245702 |
| Up | SEC24C   | 17 | 0.002351 | 311964  | 0.288717 |
| Up | MST1R    | 17 | 0.004103 | 678652  | 0.268106 |
| Up | MCM3AP   | 17 | 0.004115 | 392266  | 0.270739 |
| Up | ITPR3    | 17 | 0.002946 | 297934  | 0.280508 |
| Up | MYO15B   | 17 | 0.003585 | 667898  | 0.264368 |
| Up | SUN2     | 17 | 0.002803 | 298466  | 0.25601  |
| Up | PKP3     | 16 | 0.003962 | 352604  | 0.287479 |
| Up | SPECC1L  | 16 | 0.001354 | 171032  | 0.283847 |
| Up | MAP3K10  | 16 | 0.002519 | 345136  | 0.255539 |
| Up | RALGDS   | 16 | 0.004934 | 1197180 | 0.244681 |
| Up | CGN      | 16 | 5.78E-04 | 132720  | 0.271155 |
| Up | CCDC120  | 16 | 0.002569 | 828776  | 0.221129 |
| Up | CNOT3    | 15 | 8.79E-04 | 85556   | 0.245531 |
| Up | ZBTB7B   | 15 | 0.002981 | 436352  | 0.271628 |
| Up | NEURL4   | 15 | 0.003567 | 265844  | 0.263812 |
| Up | HSPG2    | 15 | 0.003442 | 488570  | 0.265415 |
| Up | VAV2     | 15 | 0.002718 | 322246  | 0.285977 |
| Up | TFE3     | 15 | 0.004081 | 253496  | 0.276556 |
| Up | HIC1     | 15 | 0.003485 | 698408  | 0.246013 |
| Up | SARM1    | 15 | 0.005388 | 445592  | 0.233006 |
| Up | SGSM2    | 14 | 0.005277 | 923390  | 0.23832  |
| Up | PLXNB1   | 14 | 0.003827 | 333106  | 0.229484 |
| Up | BRPF1    | 14 | 0.003446 | 483314  | 0.24425  |
| Up | POLE     | 14 | 0.003112 | 503172  | 0.258444 |
| Up | SLC25A22 | 14 | 0.002789 | 366390  | 0.249135 |
| Up | PLEKHG1  | 14 | 0.001719 | 299162  | 0.249567 |
| Up | OAS3     | 14 | 0.002889 | 226356  | 0.243684 |
| Up | MAPK8IP3 | 14 | 0.00236  | 403108  | 0.232964 |
| Up | PLD2     | 13 | 0.002083 | 245424  | 0.282383 |
| Up | NOS2     | 13 | 0.002821 | 251020  | 0.261328 |
| Up | PAN2     | 13 | 0.003808 | 270874  | 0.254518 |
| Up | SKIV2L   | 13 | 0.002807 | 569296  | 0.233482 |
| Up | NUP188   | 13 | 0.002312 | 441004  | 0.258806 |
| Up | GBF1     | 13 | 0.002156 | 543330  | 0.23873  |
| Up | CAMSAP3  | 13 | 0.002315 | 267954  | 0.258221 |
| Up | TNKS1BP1 | 12 | 0.002095 | 248304  | 0.254885 |
| Up | LDLR     | 12 | 0.002881 | 383272  | 0.226041 |
| Up | CIITA    | 12 | 0.002631 | 530768  | 0.242437 |
| Up | ABCA2    | 12 | 0.003394 | 284740  | 0.269201 |
| Up | EDEM1    | 12 | 0.003795 | 608306  | 0.21604  |
| Up | CIC      | 12 | 0.00224  | 342592  | 0.23468  |
| Up | POLRMT   | 11 | 0.003106 | 399074  | 0.245329 |
| Up | ARAP1    | 11 | 0.001812 | 252668  | 0.271818 |
| Up | MAPK4    | 11 | 0.002827 | 513354  | 0.244189 |

|      |         |     |          |         |          |
|------|---------|-----|----------|---------|----------|
| Up   | CLCN7   | 11  | 9.41E-04 | 102048  | 0.246621 |
| Up   | COL17A1 | 3   | 1.61E-04 | 21788   | 0.244928 |
| Up   | MYO1D   | 2   | 6.19E-05 | 17036   | 0.264692 |
| Up   | RAVER1  | 1   | 0        | 0       | 0.232337 |
| Up   | EVPL    | 1   | 0        | 0       | 0.220953 |
| Up   | ZC3H3   | 1   | 0        | 0       | 0.218016 |
| Up   | PCSK9   | 1   | 0        | 0       | 0.184375 |
| Up   | MAN2A2  | 1   | 0        | 0       | 0.246481 |
| Up   | PLEKHN1 | 1   | 0        | 0       | 0.242498 |
| Up   | NDOR1   | 1   | 0        | 0       | 0.242498 |
| Up   | CMTR1   | 1   | 0        | 0       | 0.242498 |
| Up   | CASR    | 1   | 0        | 0       | 0.260837 |
| Up   | PASK    | 1   | 0        | 0       | 0.219146 |
| Up   | ELF4    | 1   | 0        | 0       | 0.247801 |
| Up   | SHROOM3 | 1   | 0        | 0       | 0.258685 |
| Up   | NOTCH3  | 1   | 0        | 0       | 0.246403 |
| Up   | JAG1    | 1   | 0        | 0       | 0.246403 |
| Up   | FAAP100 | 1   | 0        | 0       | 0.22587  |
| Up   | SNX33   | 1   | 0        | 0       | 0.218998 |
| Up   | SH3RF3  | 1   | 0        | 0       | 0.218998 |
| Up   | ROBO1   | 1   | 0        | 0       | 0.229173 |
| Up   | PLEKHM1 | 1   | 0        | 0       | 0.216715 |
| Up   | EPS8L2  | 1   | 0        | 0       | 0.223301 |
| Up   | KLHL15  | 1   | 0        | 0       | 0.223301 |
| Up   | ARNT2   | 1   | 0        | 0       | 0.212265 |
| Up   | CAND2   | 1   | 0        | 0       | 0.19714  |
| Up   | COL1A1  | 1   | 0        | 0       | 0.211239 |
| Up   | USP9Y   | 1   | 0        | 0       | 0.248371 |
| Up   | ZBTB7C  | 1   | 0        | 0       | 0.209451 |
| Up   | NPC1    | 1   | 0        | 0       | 0.244496 |
| Up   | PLXNB2  | 1   | 0        | 0       | 0.211434 |
| Up   | NDST1   | 1   | 0        | 0       | 0.210803 |
| Up   | SBF1    | 1   | 0        | 0       | 0.204665 |
| Up   | MAST2   | 1   | 0        | 0       | 0.219691 |
| Up   | CC2D1B  | 1   | 0        | 0       | 0.233397 |
| Up   | PCDH1   | 1   | 0        | 0       | 0.212115 |
| Up   | LRP4    | 1   | 0        | 0       | 0.209068 |
| Up   | HR      | 1   | 0        | 0       | 0.218838 |
| Down | TCF4    | 186 | 0.080443 | 7982798 | 0.320102 |
| Down | VIM     | 146 | 0.062238 | 9673084 | 0.327078 |
| Down | LRRK2   | 114 | 0.046449 | 5881270 | 0.333305 |
| Down | IFI16   | 91  | 0.035934 | 2890936 | 0.294671 |
| Down | CAV1    | 74  | 0.034501 | 3642486 | 0.323593 |
| Down | CCNB1   | 67  | 0.028307 | 3723968 | 0.305943 |
| Down | TUBA1A  | 54  | 0.017017 | 1928674 | 0.312334 |
| Down | HAP1    | 54  | 0.019204 | 1861478 | 0.274661 |
| Down | TEX11   | 50  | 0.016505 | 2365480 | 0.276872 |
| Down | EXOSC5  | 50  | 0.015531 | 2259640 | 0.264314 |
| Down | LYAR    | 49  | 0.015456 | 1491732 | 0.2875   |
| Down | MAD2L1  | 46  | 0.012966 | 1529406 | 0.285096 |
| Down | FBL     | 43  | 0.01081  | 2684978 | 0.28063  |
| Down | TCEA2   | 42  | 0.015079 | 1397158 | 0.304385 |
| Down | BRCA2   | 42  | 0.013417 | 1411010 | 0.306159 |
| Down | HCK     | 38  | 0.009214 | 1581626 | 0.275225 |
| Down | S100A4  | 38  | 0.011937 | 1334286 | 0.308713 |



|      |            |    |          |         |          |
|------|------------|----|----------|---------|----------|
| Down | RPS4X      | 38 | 0.008171 | 1891866 | 0.28069  |
| Down | ITGB3BP    | 36 | 0.011135 | 1173054 | 0.277702 |
| Down | PFDN2      | 34 | 0.010954 | 1159404 | 0.287883 |
| Down | PAFAH1B3   | 34 | 0.007115 | 1225492 | 0.276655 |
| Down | CREB5      | 33 | 0.007423 | 1042674 | 0.263704 |
| Down | NUF2       | 33 | 0.009332 | 1497642 | 0.273232 |
| Down | ANXA1      | 32 | 0.009055 | 1258680 | 0.300828 |
| Down | S100A8     | 32 | 0.007253 | 969342  | 0.296288 |
| Down | BEX2       | 32 | 0.006112 | 1138900 | 0.266342 |
| Down | KIT        | 29 | 0.005841 | 995856  | 0.269332 |
| Down | PTTG1      | 28 | 0.007971 | 885382  | 0.278778 |
| Down | CD14       | 27 | 0.010174 | 1142284 | 0.252141 |
| Down | MAP1B      | 26 | 0.007889 | 1000130 | 0.280792 |
| Down | STAMBPL1   | 25 | 0.009389 | 938512  | 0.294849 |
| Down | SPI1       | 25 | 0.007279 | 1669826 | 0.247864 |
| Down | BIRC5      | 24 | 0.005049 | 829220  | 0.263062 |
| Down | LGALS1     | 24 | 0.006761 | 794124  | 0.278438 |
| Down | MRPL12     | 23 | 0.006117 | 474738  | 0.232074 |
| Down | GADD45GIP1 | 23 | 0.007364 | 1019392 | 0.26103  |
| Down | RUNX2      | 23 | 0.004951 | 787346  | 0.273232 |
| Down | HMMR       | 22 | 0.006724 | 667876  | 0.283702 |
| Down | MRPL11     | 22 | 0.005876 | 985534  | 0.25752  |
| Down | CTTNBP2    | 21 | 0.004426 | 787798  | 0.24425  |
| Down | CXCR4      | 19 | 0.005717 | 543656  | 0.273906 |
| Down | S100A9     | 19 | 0.003264 | 447986  | 0.290096 |
| Down | APIP       | 19 | 0.005534 | 501570  | 0.25672  |
| Down | CHST15     | 19 | 0.007661 | 688762  | 0.242619 |
| Down | NIFK       | 19 | 0.002299 | 238114  | 0.255892 |
| Down | CLEC7A     | 18 | 0.006805 | 705330  | 0.230123 |
| Down | ITGB2      | 18 | 0.005111 | 858702  | 0.255069 |
| Down | CCNB2      | 17 | 0.003261 | 302214  | 0.284908 |
| Down | CSF2RB     | 17 | 0.003237 | 336200  | 0.269556 |
| Down | UBE2C      | 16 | 0.003855 | 338616  | 0.239716 |
| Down | RSL1D1     | 16 | 0.002422 | 568444  | 0.266032 |
| Down | BMX        | 16 | 0.003102 | 427964  | 0.270871 |
| Down | BASP1      | 16 | 9.25E-04 | 116044  | 0.289254 |
| Down | HMGB2      | 16 | 0.002726 | 287668  | 0.288717 |
| Down | CENPH      | 16 | 0.002996 | 429184  | 0.232699 |
| Down | PIK3CG     | 15 | 0.002579 | 343204  | 0.24376  |
| Down | LAMA1      | 15 | 0.003191 | 501700  | 0.244789 |
| Down | RRM2       | 15 | 0.002497 | 292850  | 0.266635 |
| Down | ARL3       | 15 | 0.004764 | 699338  | 0.239583 |
| Down | BEX3       | 15 | 0.002634 | 450090  | 0.22441  |
| Down | NFIX       | 15 | 0.00342  | 599404  | 0.247848 |
| Down | PBK        | 15 | 0.003952 | 470624  | 0.25672  |
| Down | TLR2       | 14 | 0.006241 | 620072  | 0.256907 |
| Down | SDC2       | 14 | 0.002352 | 187604  | 0.235077 |
| Down | TPD52L1    | 14 | 0.003523 | 710758  | 0.244958 |
| Down | TRAPPC6A   | 13 | 0.003875 | 385000  | 0.220589 |
| Down | IGFBP3     | 13 | 0.003817 | 396058  | 0.267792 |
| Down | ALOX5      | 13 | 0.004249 | 560968  | 0.229538 |
| Down | NCF2       | 13 | 0.002568 | 384186  | 0.247202 |
| Down | MRPL24     | 13 | 0.00178  | 265534  | 0.224799 |
| Down | VRK1       | 13 | 0.003819 | 710302  | 0.268941 |
| Down | NDUFA4L2   | 13 | 0.003033 | 413372  | 0.229308 |

|      |           |    |          |        |          |
|------|-----------|----|----------|--------|----------|
| Down | NHP2      | 13 | 0.002409 | 442338 | 0.256585 |
| Down | HSPA4L    | 12 | 0.002179 | 357762 | 0.244373 |
| Down | FGR       | 12 | 0.001217 | 240718 | 0.270871 |
| Down | IRAK3     | 12 | 0.003972 | 375334 | 0.226067 |
| Down | TNFAIP6   | 12 | 0.004525 | 497610 | 0.235804 |
| Down | CXCL8     | 12 | 0.003383 | 302392 | 0.241789 |
| Down | PTAFR     | 12 | 0.004579 | 353666 | 0.271401 |
| Down | UBE2T     | 12 | 0.003223 | 341734 | 0.2313   |
| Down | BATF3     | 12 | 0.002277 | 453320 | 0.2488   |
| Down | MMP9      | 11 | 0.003658 | 450160 | 0.180556 |
| Down | FGF2      | 11 | 0.002043 | 235084 | 0.227963 |
| Down | STMN1     | 11 | 0.003185 | 307830 | 0.255842 |
| Down | S100P     | 11 | 0.001764 | 315852 | 0.227323 |
| Down | NDUFA8    | 11 | 0.002739 | 583540 | 0.24271  |
| Down | PRDX4     | 11 | 0.001041 | 137274 | 0.238715 |
| Down | BCL2A1    | 11 | 0.003206 | 376082 | 0.216161 |
| Down | SMYD3     | 11 | 0.003453 | 535448 | 0.248006 |
| Down | CXCR1     | 10 | 0.001934 | 164726 | 0.255186 |
| Down | PLG       | 10 | 0.00265  | 266336 | 0.257964 |
| Down | CXCR2     | 10 | 0.002068 | 216138 | 0.246621 |
| Down | NFE2      | 10 | 0.001155 | 164280 | 0.229173 |
| Down | CCDC112   | 10 | 0.001394 | 309290 | 0.234878 |
| Down | AJUBA     | 10 | 0.00185  | 307250 | 0.233482 |
| Down | DYRK4     | 10 | 0.002243 | 292244 | 0.24845  |
| Down | PYGL      | 9  | 0.001357 | 199290 | 0.24209  |
| Down | TIMP1     | 9  | 0.006389 | 867010 | 0.217418 |
| Down | SLA       | 9  | 0.001338 | 164562 | 0.264584 |
| Down | PECAM1    | 9  | 2.25E-04 | 38116  | 0.264548 |
| Down | CCDC115   | 9  | 7.15E-04 | 107558 | 0.276222 |
| Down | PTPN14    | 9  | 8.80E-04 | 142750 | 0.251212 |
| Down | CMSS1     | 9  | 0.001802 | 478908 | 0.222559 |
| Down | TNFRSF10C | 8  | 0.001686 | 332028 | 0.218961 |
| Down | FYB1      | 8  | 7.16E-04 | 168084 | 0.237374 |
| Down | CSTA      | 8  | 0.001279 | 275406 | 0.237244 |
| Down | PLEK      | 8  | 0.002115 | 303358 | 0.216667 |
| Down | CSF3R     | 8  | 0.001004 | 108322 | 0.274719 |
| Down | CDA       | 8  | 0.001648 | 243100 | 0.216269 |
| Down | RANBP1    | 8  | 0.001213 | 204118 | 0.251228 |
| Down | EFEMP1    | 8  | 0.001884 | 266664 | 0.234185 |
| Down | PTPRO     | 8  | 0.001079 | 89316  | 0.239998 |
| Down | LYSMD2    | 8  | 0.001347 | 151090 | 0.233538 |
| Down | NTM       | 8  | 0.002058 | 193084 | 0.198499 |
| Down | NOB1      | 8  | 0.001127 | 187878 | 0.246574 |
| Down | TYROBP    | 7  | 1        | 20     | 1        |
| Down | ARG1      | 7  | 8.37E-04 | 170482 | 0.247029 |
| Down | GSTA1     | 7  | 0.001554 | 237926 | 0.209587 |
| Down | CSF2RA    | 7  | 5.23E-04 | 40794  | 0.240845 |
| Down | PRIM1     | 7  | 0.002087 | 229566 | 0.207661 |
| Down | TFB1M     | 1  | 0        | 0      | 0.19701  |
| Down | TREM1     | 1  | 0        | 0      | 0.555556 |
| Down | LY96      | 1  | 0        | 0      | 0.204407 |
| Down | PMS1      | 1  | 0        | 0      | 0.218016 |
| Down | MATK      | 1  | 0        | 0      | 0.246559 |
| Down | ITGAM     | 1  | 0        | 0      | 0.203242 |
| Down | ITGAX     | 1  | 0        | 0      | 0.203242 |

|      |         |   |   |   |          |
|------|---------|---|---|---|----------|
| Down | PLA2G2A | 1 | 0 | 0 | 0.246481 |
| Down | ALOX5AP | 1 | 0 | 0 | 0.186695 |
| Down | LCN2    | 1 | 0 | 0 | 0.152947 |
| Down | PSTPIP2 | 1 | 0 | 0 | 0.248371 |
| Down | DCLK2   | 1 | 0 | 0 | 0.248514 |
| Down | NINJ2   | 1 | 0 | 0 | 0.187082 |
| Down | SIRPB1  | 1 | 0 | 0 | 0.555556 |
| Down | LTF     | 1 | 0 | 0 | 0.201378 |
| Down | FPR1    | 1 | 0 | 0 | 0.220401 |
| Down | PRNP    | 1 | 0 | 0 | 0.213478 |
| Down | ADH1B   | 1 | 0 | 0 | 0.247801 |
| Down | GCA     | 1 | 0 | 0 | 0.258685 |
| Down | NMU     | 1 | 0 | 0 | 0.223301 |
| Down | ALPL    | 1 | 0 | 0 | 0.214207 |

**Table S5.** miRNA - target gene and TF - target gene interaction.

| Regulation | Target Genes | Degree | MicroRNA        | Regulation | Target Genes | Degree | TF      |
|------------|--------------|--------|-----------------|------------|--------------|--------|---------|
| Up         | MYH9         | 116    | hsa-mir-4329    | Up         | CLTC         | 59     | SMARCA4 |
| Up         | ERBB2        | 73     | hsa-mir-4315    | Up         | MYH9         | 53     | TCF7    |
| Up         | MYO18A       | 71     | hsa-mir-1299    | Up         | NOTCH1       | 45     | MYB     |
| Up         | SEC16A       | 66     | hsa-mir-4779    | Up         | SHC1         | 42     | E2F4    |
| Up         | PLCG1        | 56     | hsa-mir-3685    | Up         | KIFC3        | 42     | CUX1    |
| Up         | NOTCH1       | 44     | hsa-mir-623     | Up         | MYO18A       | 40     | SALL4   |
| Up         | CLTC         | 31     | hsa-mir-543     | Up         | PML          | 32     | CTCF    |
| Up         | FLNA         | 23     | hsa-mir-155-5p  | Up         | PLCG1        | 29     | SOX17   |
| Up         | SHC1         | 10     | hsa-mir-5582-5p | Up         | ERBB2        | 24     | MTF2    |
| Up         | KIFC3        | 8      | hsa-mir-5193    | Up         | UPF1         | 23     | ZFX     |
| Up         | HDAC6        | 5      | hsa-mir-548m    | Up         | HDAC6        | 22     | TFAP2A  |
| Up         | UPF1         | 5      | hsa-mir-4635    | Up         | SEC16A       | 21     | CEBPB   |
| Up         | DCTN1        | 4      | hsa-mir-361-5p  | Up         | FLNA         | 18     | SETDB1  |
| Up         | PML          | 3      | hsa-mir-378a-3p | Up         | DCTN1        | 15     | RBPJ    |
| Up         | TNS2         | 2      | hsa-mir-26b-5p  | Down       | TCF4         | 50     | NANOG   |
| Down       | CCNB1        | 84     | hsa-mir-6134    | Down       | VIM          | 43     | GFI1B   |
| Down       | CAV1         | 58     | hsa-mir-4459    | Down       | CAV1         | 36     | GATA4   |
| Down       | VIM          | 30     | hsa-mir-6124    | Down       | FBL          | 33     | HIF1A   |
| Down       | HAP1         | 22     | hsa-mir-9500    | Down       | TUBA1A       | 32     | CLOCK   |
| Down       | MAD2L1       | 17     | hsa-mir-1297    | Down       | EXOSC5       | 29     | FLI1    |
| Down       | TCF4         | 15     | hsa-mir-203a-3p | Down       | MAD2L1       | 27     | AP1S2   |
| Down       | BRCA2        | 12     | hsa-mir-1245a   | Down       | TCEA2        | 26     | MYCN    |
| Down       | TUBA1A       | 9      | hsa-mir-744-5p  | Down       | BRCA2        | 26     | E2F1    |
| Down       | IFI16        | 6      | hsa-mir-136-5p  | Down       | LYAR         | 22     | AR      |
| Down       | LRRK2        | 4      | hsa-mir-582-3p  | Down       | IFI16        | 19     | REST    |
| Down       | FBL          | 3      | hsa-mir-181b-5p | Down       | CCNB1        | 18     | KLF4    |
| Down       | TCEA2        | 2      | hsa-mir-17-5p   | Down       | LRRK2        | 16     | SUZ12   |
| Down       | LYAR         | 1      | hsa-mir-16-5p   | Down       | HAP1         | 15     | RUNX1   |
| Down       | EXOSC5       | 1      | hsa-mir-31-5p   | Down       | TEX11        | 6      | SMAD4   |
